# Supplementary material
Source: bioRxiv or medRxiv preprint supplement (https://www.biorxiv.org/highwire/filestream/40447/field_highwire_adjunct_files/0/137356-1.pdf)

# Supplementary text 1:

## Distribution of Spacer Hits: Contributions of Microbial Diversity and Diversity of CRISPR-Cas systems

The entire set of identified CRISPR arrays, all the matching protospaces and, separately, the subset of virus protospaces were broken down by the CRISPR-Cas system subtype and by the microbial phyla (Table X1-X3). For all 88 phylum/subtype categories with at least 10 matches, the fraction of spacers with matches and the fraction of virus matches among all matches were calculated. Both of these fractions were analyzed as follows.

The calculated fraction  $f_{i,j}$  for the spacers in phylum  $i$  and belonging to the category  $j$  was modeled as the product of a phylum-specific factor  $p_i$  and a subtype-specific factor  $s_j$ . The deviation of the observed and the predicted fractions was assumed to be log-normally distributed with the expectation of 1. Formally,

$$\log f_{i,j} = \log p_i + \log s_j + e_{i,j}$$

where  $e_{i,j} \sim \text{Norm}(0, \sigma)$ .

Optimization of vectors  $\mathbf{p}$  and  $\mathbf{s}$  with respect to  $\Sigma e^2$  provides both the phylum- and subtype-specific contribution factors and the residuals  $e_{i,j}$  that allow one to estimate the quality of the fit between the model and the observation. Setting one of the vectors to an arbitrary positive value (e.g. 1) and optimizing the other provides a model with phylum- or subtype-only contributions; the null model replaces both vectors with  $\text{mean}(\log f_{i,j})$ . The sums of squared residuals can be compared using the Fisher F-test.

Contribution of phylum- and subtype-specific factors to the fraction of spacers with matches

|                           | phylum- and subtype | subtype- | subtype- | None  |
|---------------------------|---------------------|----------|----------|-------|
| No. of data points        | 88                  | 88       | 88       | 88    |
| No. of parameters         | 39                  | 21       | 18       | 0     |
| No. of degrees of freedom | 47                  | 65       | 68       | 85    |
| $\Sigma e^2$              | 4.32                | 7.17     | 13.02    | 18.30 |

Contribution of phylum- and subtype-specific factors to the fraction of spacer matches to virus sequences

|                    | phylum- and subtype | subtype- | subtype- | None |
|--------------------|---------------------|----------|----------|------|
| No. of data points | 88                  | 88       | 88       | 88   |

|                           |      |      |      |      |
|---------------------------|------|------|------|------|
| No. of parameters         | 39   | 21   | 18   | 0    |
| No. of degrees of freedom | 47   | 65   | 68   | 85   |
| $\Sigma e^2$              | 0.24 | 0.40 | 0.66 | 0.79 |

For both the overall fraction of matches and the fraction of viral matches, both phylum- and subtype-specific factors provide significant and independent contributions to the reduction of residuals (Fisher F-test p-value <0.05 except p=0.07 for the contribution of subtype-specific factors alone to the overall fraction of matches). Taken together, the two factors explain 70-75% of the original variance in the observed fraction.



|                                       |    |     |      |     |     |     |   |     |    |   |     |    |     |     |     |     |   |     |    |   |   |   |      |
|---------------------------------------|----|-----|------|-----|-----|-----|---|-----|----|---|-----|----|-----|-----|-----|-----|---|-----|----|---|---|---|------|
| Thaumarchaeota                        | 0  | 21  | 252  | 0   | 0   | 0   | 0 | 0   | 0  | 0 | 0   | 22 | 0   | 0   | 0   | 41  | 0 | 0   | 0  | 0 | 0 | 0 | 225  |
| Thermobaculum                         | 0  | 0   | 0    | 0   | 0   | 18  | 0 | 0   | 0  | 0 | 0   | 0  | 0   | 0   | 0   | 0   | 0 | 0   | 0  | 0 | 0 | 0 | 35   |
| Thermococci                           | 59 | 416 | 495  | 0   | 0   | 0   | 0 | 0   | 0  | 0 | 0   | 0  | 153 | 117 | 0   | 0   | 0 | 0   | 0  | 0 | 0 | 0 | 1970 |
| Thermodesulfobacteria                 | 0  | 0   | 187  | 0   | 0   | 0   | 0 | 0   | 0  | 0 | 0   | 0  | 29  | 51  | 0   | 0   | 0 | 0   | 0  | 0 | 0 | 0 | 63   |
| Thermoplasmata                        | 13 | 0   | 117  | 112 | 194 | 32  | 0 | 84  | 0  | 0 | 0   | 0  | 63  | 32  | 0   | 0   | 0 | 108 | 0  | 0 | 0 | 0 | 547  |
| Thermotogae                           | 0  | 6   | 1226 | 0   | 43  | 0   | 0 | 0   | 0  | 0 | 0   | 72 | 212 | 368 | 242 | 50  | 0 | 0   | 0  | 0 | 0 | 0 | 1512 |
| unclassified                          | 0  | 0   | 0    | 0   | 0   | 171 | 0 | 0   | 0  | 0 | 0   | 0  | 0   | 0   | 0   | 0   | 0 | 0   | 0  | 0 | 0 | 0 | 87   |
| Acidobacteria                         |    |     |      |     |     |     |   |     |    |   |     |    |     |     |     |     |   |     |    |   |   |   |      |
| unclassified Archaea (miscellaneous)  | 0  | 0   | 0    | 0   | 60  | 0   | 0 | 0   | 0  | 0 | 0   | 0  | 0   | 0   | 0   | 0   | 0 | 0   | 0  | 0 | 0 | 0 | 8    |
| unclassified Bacteria (miscellaneous) | 3  | 0   | 631  | 123 | 408 | 17  | 0 | 0   | 24 | 0 | 237 | 3  | 33  | 196 | 0   | 289 | 0 | 0   | 0  | 0 | 0 | 0 | 850  |
| unclassified Euryarchaeota            | 0  | 0   | 32   | 0   | 1   | 0   | 0 | 0   | 0  | 0 | 0   | 20 | 21  | 0   | 0   | 0   | 0 | 0   | 0  | 0 | 0 | 0 | 51   |
| unclassified Proteobacteria           | 0  | 0   | 0    | 0   | 0   | 0   | 8 | 0   | 0  | 0 | 0   | 0  | 0   | 0   | 0   | 0   | 0 | 0   | 0  | 0 | 0 | 0 | 0    |
| uncultured archaeon                   | 0  | 0   | 0    | 55  | 0   | 0   | 0 | 0   | 0  | 0 | 0   | 0  | 0   | 0   | 0   | 0   | 0 | 0   | 0  | 0 | 0 | 0 | 0    |
| Verrucomicrobia                       | 0  | 0   | 0    | 201 | 0   | 63  | 0 | 119 | 0  | 0 | 67  | 0  | 0   | 123 | 0   | 15  | 0 | 0   | 23 | 0 | 0 | 0 | 80   |
| Zetaproteobacteria                    | 0  | 0   | 0    | 0   | 0   | 0   | 0 | 0   | 0  | 0 | 0   | 0  | 0   | 0   | 0   | 5   | 0 | 0   | 0  | 0 | 0 | 0 | 25   |

## Number of spacers with hits

| Phylum                                         | I   | I-A | I-B  | I-C | I-D | I-E  | I-F  | I-U | II-A | II-B | II-C | III | III-A | III-B | III-C | III-D | IV-A | V-A | V-B | VI-A | VI-B | VI-C | V-U | ?    |
|------------------------------------------------|-----|-----|------|-----|-----|------|------|-----|------|------|------|-----|-------|-------|-------|-------|------|-----|-----|------|------|------|-----|------|
| Acidithiobacillia                              | 0   | 0   | 0    | 0   | 0   | 0    | 0    | 0   | 0    | 0    | 0    | 0   | 0     | 0     | 0     | 2     | 0    | 0   | 0   | 0    | 0    | 0    | 0   | 0    |
| Acidobacteria                                  | 0   | 0   | 0    | 0   | 0   | 0    | 0    | 0   | 0    | 0    | 0    | 0   | 0     | 0     | 0     | 0     | 0    | 0   | 0   | 0    | 0    | 0    | 0   | 1    |
| Actinobacteria                                 | 56  | 6   | 120  | 429 | 0   | 1716 | 0    | 287 | 20   | 0    | 145  | 3   | 11    | 1     | 0     | 11    | 63   | 0   | 0   | 0    | 0    | 0    | 0   | 746  |
| Alphaproteobacteria                            | 0   | 1   | 0    | 45  | 0   | 34   | 0    | 0   | 0    | 0    | 10   | 0   | 0     | 1     | 0     | 2     | 0    | 0   | 0   | 0    | 0    | 0    | 0   | 27   |
| Aquificae                                      | 0   | 0   | 5    | 0   | 0   | 0    | 0    | 0   | 0    | 0    | 0    | 0   | 0     | 0     | 1     | 0     | 0    | 0   | 0   | 0    | 0    | 0    | 0   | 4    |
| Armatimonadetes                                | 0   | 0   | 0    | 0   | 0   | 0    | 0    | 0   | 0    | 0    | 0    | 0   | 0     | 0     | 0     | 0     | 0    | 0   | 0   | 0    | 0    | 0    | 0   | 1    |
| Bacteria candidate phyla                       | 0   | 0   | 0    | 0   | 0   | 0    | 0    | 0   | 0    | 0    | 0    | 0   | 0     | 0     | 0     | 0     | 0    | 0   | 0   | 0    | 0    | 0    | 0   | 1    |
| Bacteroidetes/Chlorobi group                   | 1   | 0   | 230  | 98  | 0   | 3    | 0    | 4   | 1    | 0    | 319  | 4   | 8     | 16    | 1     | 8     | 0    | 5   | 0   | 0    | 50   | 0    | 0   | 92   |
| Betaproteobacteria                             | 2   | 9   | 0    | 157 | 1   | 72   | 116  | 0   | 0    | 0    | 221  | 2   | 2     | 5     | 2     | 0     | 0    | 0   | 0   | 0    | 0    | 0    | 0   | 319  |
| Candidatus                                     | 0   | 0   | 0    | 0   | 0   | 0    | 0    | 0   | 0    | 0    | 0    | 0   | 0     | 0     | 0     | 0     | 0    | 0   | 0   | 0    | 0    | 0    | 0   | 2    |
| Marinimicrobia                                 |     |     |      |     |     |      |      |     |      |      |      |     |       |       |       |       |      |     |     |      |      |      |     |      |
| Chloroflexi                                    | 0   | 0   | 1    | 7   | 0   | 16   | 0    | 0   | 0    | 0    | 0    | 0   | 2     | 0     | 0     | 2     | 0    | 0   | 0   | 0    | 0    | 0    | 0   | 2    |
| Chrysiogenetes                                 | 0   | 0   | 0    | 0   | 0   | 0    | 1    | 0   | 0    | 0    | 0    | 0   | 0     | 0     | 0     | 0     | 0    | 0   | 0   | 0    | 0    | 0    | 0   | 0    |
| Cloacimonetes                                  | 0   | 0   | 0    | 0   | 0   | 0    | 0    | 0   | 0    | 0    | 0    | 0   | 0     | 0     | 0     | 0     | 0    | 0   | 0   | 0    | 0    | 0    | 0   | 1    |
| Crenarchaeota                                  | 5   | 69  | 0    | 0   | 3   | 0    | 0    | 0   | 0    | 0    | 0    | 0   | 5     | 4     | 0     | 21    | 0    | 0   | 0   | 0    | 0    | 0    | 0   | 12   |
| Cyanobacteria/Melainabacteria group            | 0   | 0   | 25   | 1   | 35  | 3    | 0    | 1   | 0    | 0    | 0    | 4   | 2     | 16    | 0     | 4     | 0    | 0   | 0   | 0    | 0    | 0    | 1   | 34   |
| Deinococcus-Thermus delta/epsilon subdivisions | 0   | 5   | 6    | 9   | 0   | 38   | 0    | 4   | 0    | 0    | 0    | 0   | 0     | 1     | 0     | 0     | 1    | 0   | 0   | 0    | 0    | 0    | 0   | 21   |
| Elusimicrobia                                  | 7   | 0   | 52   | 28  | 0   | 16   | 7    | 2   | 0    | 2    | 178  | 0   | 5     | 1     | 0     | 8     | 2    | 0   | 0   | 0    | 0    | 0    | 0   | 70   |
| environmental samples                          | 0   | 0   | 0    | 0   | 0   | 0    | 0    | 0   | 0    | 0    | 1    | 0   | 0     | 0     | 0     | 0     | 0    | 0   | 0   | 0    | 0    | 0    | 0   | 0    |
| Fibrobacteres                                  | 0   | 0   | 0    | 0   | 0   | 0    | 0    | 0   | 0    | 0    | 3    | 0   | 0     | 0     | 0     | 0     | 0    | 0   | 0   | 0    | 0    | 0    | 0   | 0    |
| Firmicutes                                     | 40  | 6   | 1380 | 978 | 11  | 338  | 7    | 0   | 2608 | 0    | 115  | 35  | 94    | 136   | 33    | 34    | 13   | 0   | 7   | 8    | 0    | 0    | 2   | 1798 |
| Fusobacteriia                                  | 0   | 0   | 448  | 0   | 0   | 0    | 0    | 0   | 10   | 0    | 1    | 19  | 24    | 0     | 0     | 1     | 1    | 0   | 0   | 0    | 0    | 2    | 0   | 123  |
| Gammaproteobacteria                            | 286 | 0   | 0    | 529 | 0   | 1950 | 4736 | 12  | 0    | 7    | 46   | 0   | 13    | 45    | 0     | 15    | 65   | 0   | 0   | 0    | 0    | 0    | 0   | 2534 |
| Halobacteria                                   | 0   | 0   | 47   | 0   | 1   | 0    | 0    | 0   | 0    | 0    | 0    | 0   | 0     | 0     | 0     | 0     | 0    | 0   | 0   | 0    | 0    | 0    | 0   | 26   |
| Methanobacteria                                | 0   | 0   | 37   | 0   | 0   | 0    | 0    | 0   | 0    | 0    | 0    | 1   | 6     | 0     | 0     | 0     | 0    | 0   | 0   | 0    | 0    | 0    | 0   | 3    |
| Methanococci                                   | 0   | 1   | 5    | 0   | 0   | 0    | 0    | 0   | 0    | 0    | 0    | 0   | 0     | 0     | 0     | 0     | 0    | 0   | 0   | 0    | 0    | 0    | 0   | 0    |
| Methanomicrobia                                | 9   | 0   | 36   | 14  | 9   | 8    | 0    | 1   | 0    | 0    | 0    | 3   | 2     | 31    | 4     | 14    | 0    | 0   | 0   | 0    | 0    | 0    | 0   | 10   |
| nitrifying bacterium enrichment culture        | 0   | 0   | 0    | 0   | 0   | 1    | 0    | 0   | 0    | 0    | 0    | 0   | 0     | 1     | 0     | 0     | 0    | 0   | 0   | 0    | 0    | 0    | 0   | 0    |
| Nitrospira                                     | 0   | 0   | 0    | 0   | 0   | 11   | 0    | 0   | 0    | 0    | 0    | 0   | 0     | 0     | 0     | 0     | 0    | 0   | 0   | 0    | 0    | 0    | 0   | 2    |
| Planctomycetes                                 | 1   | 0   | 1    | 9   | 0   | 0    | 0    | 1   | 0    | 0    | 1    | 0   | 0     | 0     | 1     | 0     | 0    | 0   | 0   | 0    | 0    | 0    | 0   | 0    |
| Spirochaetia                                   | 106 | 3   | 268  | 40  | 0   | 263  | 0    | 0   | 15   | 0    | 16   | 0   | 0     | 0     | 0     | 0     | 0    | 0   | 0   | 0    | 0    | 0    | 0   | 462  |
| Synergistia                                    | 0   | 0   | 0    | 13  | 0   | 6    | 0    | 0   | 0    | 0    | 0    | 0   | 2     | 1     | 0     | 0     | 0    | 0   | 0   | 0    | 0    | 0    | 0   | 0    |
| Tenericutes                                    | 0   | 0   | 0    | 0   | 0   | 0    | 0    | 0   | 25   | 0    | 1    | 0   | 0     | 0     | 0     | 0     | 0    | 0   | 0   | 0    | 0    | 0    | 0   | 0    |
| Thaumarchaeota                                 | 0   | 0   | 1    | 0   | 0   | 0    | 0    | 0   | 0    | 0    | 0    | 1   | 0     | 0     | 0     | 0     | 0    | 0   | 0   | 0    | 0    | 0    | 0   | 1    |
| Thermococci                                    | 0   | 2   | 4    | 0   | 0   | 0    | 0    | 0   | 0    | 0    | 0    | 0   | 0     | 0     | 0     | 0     | 0    | 0   | 0   | 0    | 0    | 0    | 0   | 10   |
| Thermodesulfobacteria                          | 0   | 0   | 3    | 0   | 0   | 0    | 0    | 0   | 0    | 0    | 0    | 0   | 0     | 0     | 0     | 0     | 0    | 0   | 0   | 0    | 0    | 0    | 0   | 1    |
| Thermoplasmata                                 | 0   | 0   | 0    | 0   | 5   | 0    | 0    | 0   | 0    | 0    | 0    | 0   | 0     | 0     | 0     | 0     | 0    | 0   | 0   | 0    | 0    | 0    | 0   | 1    |
| Thermotogae                                    | 0   | 0   | 10   | 0   | 0   | 0    | 0    | 0   | 0    | 0    | 0    | 0   | 3     | 1     | 0     | 0     | 0    | 0   | 0   | 0    | 0    | 0    | 0   | 17   |
| unclassified Bacteria (miscellaneous)          | 0   | 0   | 3    | 1   | 0   | 0    | 0    | 0   | 0    | 0    | 2    | 0   | 0     | 0     | 0     | 0     | 0    | 0   | 0   | 0    | 0    | 0    | 0   | 0    |
| unclassified                                   | 0   | 0   | 0    | 0   | 0   | 0    | 1    | 0   | 0    | 0    | 0    | 0   | 0     | 0     | 0     | 0     | 0    | 0   | 0   | 0    | 0    | 0    | 0   | 0    |
| Proteobacteria                                 |     |     |      |     |     |      |      |     |      |      |      |     |       |       |       |       |      |     |     |      |      |      |     |      |
| Verrucomicrobia                                | 0   | 0   | 0    | 18  | 0   | 0    | 0    | 0   | 0    | 0    | 0    | 0   | 0     | 0     | 0     | 0     | 0    | 0   | 1   | 0    | 0    | 0    | 0   | 6    |



# Supplementary text 2

## Examples of intergenic hits into unannotated ORFs

### Spacer 1:

>JODE01000009.1\_62635\_14\_spacer\_63457\_32

GACCAGGCGTCCCCGCTGACGCTGATCGCGGT

Hit coordinates:

ContigID: LGDA01000250

Start: 45153

Stop: 45184

Intergenic sequence:

>gi|925387131|gb|LGDA01000250.1|:44655-45964 Streptomyces sp. WM6368 P399contig36.1, whole genome shotgun sequence

TAAGACATGCGGTGTGGCCGGGCACATGGATGCCCGGCATCCGACAGGGTCCTGCGAGCTGCCGCGTG  
AGCACAGTGCAGCAGGACAGGCGGAGTCTGGCGGGGAACGGGAGTCGGCTGCGGCATACCCCGGAGGACG  
ACTAAGTACAGCTGGATGGTTGCCGGCCACGCCCTCGGTGGACCATCCGACGGGGCTCCTCGTCTGC  
GGCGGCGTCGGCCAGGAGCAGGTGCGGGTCTCCAGCCGGAACGGCGCGTACCGCCCCGGCTCCGGCT  
CGTACCGGCGATACGGGGCGCTCTCGTAGACGACGGTGGTGTTCGGGCAGTCTCCGCGACCCCGAGCAG  
CGCTTGGCGCTCGGCGTCTCGGCGGCAAGGCTCCAGCGCAACTTCGCCGCGGTCCACTGGGCGGCGTAC  
TCGCAGTGGTAACCGCTGGCCGGCGGAATCCACTGCGCCGGATCCTTGTGCGCCTTCGACCGGTTGACT  
TCGCGGTACCCGCGATCAGCGTCAGCGGGGACGCCTGGTTCGTCGTACGCCTCACGCCGGACCGCGTC  
CCACGCGAAGCTGCCCGAGTCGTGGACTTCGGCCAAAGGTACGAAATGGTCTACATCAAGGCCCGCGGGC  
TCCGTCAACAACGACGTCGCCGTAAGGGCTCAGCCGCGATCCACCCGACATCTTGACGCCCGCAGCGACGA  
CCGGGGCCTCGACGGCCTCGGACAGGATGACTTCCCTGCGGGTATCACAGCCGTCCGGTTCGCGTTCAGCCC  
GCGGTTCCAGTGCTTGTACAGGTCCCACTTGTAAACCTCCCGCTGCTCATCAGCGACGGGGATCCGGTTCG  
ATGGCCTCGAACAGCGGCAGCGGGCGCACGGACTCCGGGAGCCCCAGCGATACCGGACGAGGCGGGGACGC  
CCGCTGGGTGCCGGCCGCGTGCGCCGGGTCGGTGGCGAGCAGGGGCAGGGCAGCGAGAGCGAGCGC  
GGGAGGACCACGCTGCAGCAGGTTCTTGATCACGCAGTGGGTTGTAGCGGTGCCCCAGCGGGACAGGGCC  
TGGGGCCTCAGCTACCCGACAGGCCGCGGAATCACCGCAGAAACGATCAGCGGCTGGGCCGACCGGC  
AGCCGGTCAACGCTCCTCAGCGCGAGATCATCTTTGGCCCGTGGGCAACGGCTCGGTCCCGGGCAACCC  
ACACGCATCATCGGGAGTACCAGCAGATTCCAGCGCACGGCAGTTGCAACATCATGGCGTCAGGTGCCT  
CGAGTCAGCTGCACATGACGGTCTTTGCGACGTCTCCAGACGAGGGCCG

Top 10 BLASTX hits: into HNH endonuclease

# Fields: query id, subject id, subject ids, subject length, s. start, s. end, evalue, query seq, subject seq, q. start, q. end, score, subject sci names, subject title

# 10 hits found

gi |925387131|gb|LGDA01000250.1|:44655-45964 gi |919577089|ref|WP\_052876068.1| gi |919577089|ref|WP\_052876068.1| 236 21 235 2.97e-126  
 PAAHAAGTQAGVPASSGIAGAPGVRAPLPLFEAIDRIPVADEQREGYKDWLYKHWRNLNATDGCOTRREVILSEAVEAPVVAAGCKMSSGSRSPYGDVVVTDAAAGLDVDHDFVPLAEVHDSGSFAWDVRRREAYANDQASPLTLIAVTAKSNRKADK  
 DPAQWIPPASGYHCEYAAQWTAAKLRWSLAADDAERQALLGVAEDCPNTTVVYESA  
 PTAHAEPVPTAHSTAGAPSAAGLRAPLPLFEAIDRIPVADEQREGYKDWLYKHWRNLNATDGCOTRREVILSEAVEAPVVAAGCKMSSGSRSPYDDVVVTDAAAGLDVDHDFVPLAEVHDSGGFAWDVRRREAYANDQASPLTLIAVTAKSNRKADK  
 DPAQWLPPARGYHCEYAAQWTAATKLRWNLAAADDAERQALLGVAEDCPNTTVVYESA941 297 958 Streptomyces sp. NRRL F-4335HNH endonuclease [Streptomyces sp. NRRL F-4335]  
 gi |925387131|gb|LGDA01000250.1|:44655-45964 gi |494479460|ref|WP\_007268937.1| gi |494479460|ref|WP\_007268937.1| 235 43 235 3.47e-110  
 VRAPLPLFEAIDRIPVADEQREGYKDWLYKHWRNLNATDGCOTRREVILSEAVEAPVVAAGCKMSSGSRSPYGDVVVTDAAAGLDVDHDFVPLAEVHDSGSFAWDVRRREAYANDQASPLTLIAVTAKSNRKADKPAQWIPPASGYHCEYAAQWTA  
 KLRWSLAADDAERQALLGVAEDCPNTTVVYESA  
 VRAPLPLFEAIDRITVAEEQREGYTRSLYKHWRNLNATDGCOTRREVILSEALEAPQVTAGCKMSSGLWLSPYDDVTMTDAAGLDVDHDFVPLAEVHDSGGYGDWAARREAYANDQASPLTLIAVTAKSNRKADKPAQWLPPAAGYHCQYAAATWVGT  
 KLRWDLAADEAERQALLGLAEDCPNTTVVYEPAP 872 294 852 Streptomyces sp. C HNH endonuclease [Streptomyces sp. C]  
 gi |925387131|gb|LGDA01000250.1|:44655-45964 gi |739837920|ref|WP\_037688867.1| gi |739837920|ref|WP\_037688867.1| 234 1 234 9.32e-110  
 LQRGPPALALAALPLLATAPAAHAAGTQAGVPASSGIAGAPGVRAPLPLFEAIDRIPVADEQREGYKDWLYKHWRNLNATDGCOTRREVILSEAVEAPVVAAGCKMSSGSRSPYGDVVVTDAAAGLDVDHDFVPLAEVHDSGSFAWDVRRREAYANDQ  
 SPLTLIAVTAKSNRKADKPAQWIPPASGYHCEYAAQWTAAKLRWSLAADDAERQALLGVAEDCPNTTVVYESA MFRGLPALALCALPILA-  
 APTAHSATAETAPLAATGVTGPAVGRAPLPLFEAIDRLPVAEHRDGYKRDLYKHWRNLNATDGCOTRREVILAEAVTAPVAAAGCKLTSGSWLSAYDNVVSDAARLDVDHDFVPLAEVYDSEAPWAAARREAYANDQASPLTLIAVSAASNRKADKPAEWLPS  
 DDSYHCTYAAASWGTCLRWDLAVDENERQALLGLAEDCPNTTVVYESA 998 294 849 Streptomyces lavendulae HNH endonuclease [Streptomyces lavendulae]  
 gi |925387131|gb|LGDA01000250.1|:44655-45964 gi |1154964266|ref|WP\_078869587.1| gi |1154964266|ref|WP\_078869587.1| 226 1 225 1.18e-105  
 LQRGPPALALAALPLLATAPAAHAAGTQAGVPASSGIAGAPGVRAP--  
 LPLFEAIDRIPVADEQREGYKDWLYKHWRNLNATDGCOTRREVILSEAVEAPVVAAGCKMSSGSRSPYGDVVVTDAAAGLDVDHDFVPLAEVHDSGSFAWDVRRREAYANDQASPLTLIAVTAKSNRKADKPAQWIPPASGYHCEYAAQWTA  
 QALLGVAEDCPNTTVVYESA MLRGLPALVLAAPVPLLATAPAAHA-----  
 GTALTPSSAQPVTPLFDVAQDLVADEQREGYQSRSLYKHWRNLNATDGCOTRREVILAEAVLAPTVTAGCRLSGGSWHSAYDDLTVTDAARLDVDHDFVPLAEVHDSGGFAWDVRRREAYANDQASPLTLIAVSAASNRKADKPAEWMPSDGSYHCTYTATWVAT  
 KLRWSLAADDERQALLGLAEDCPNTTVVYEPAP 998 297 821 Streptomyces sp. NRRL B-1347HNH endonuclease [Streptomyces sp. NRRL B-1347]  
 gi |925387131|gb|LGDA01000250.1|:44655-45964 gi |860602850|ref|WP\_048478564.1| gi |860602850|ref|WP\_048478564.1| 235 1 235 5.86e-105  
 LQRGPPALALAALPLLATAPAAHAAGTQAGVPASSGIAGAPGVRAPLPLFEAIDRIPVADEQREGYKDWLYKHWRNLNATDGCOTRREVILSEAVEAPVVAAGCKMSSGSRSPYGDVVVTDAAAGLDVDHDFVPLAEVHDSGSFAWDVRRREAYANDQ  
 SPLTLIAVTAKSNRKADKPAQWIPPASGYHCEYAAQWTAAKLRWSLAADDAERQALLGVAEDCPNTTVVYESA  
 MLRGLPALALCTLPLFTAAPAAHSAPTVAAPAAAL TGGPAGLRAPMPLFEAIDRLPVGEHREGYKRDLYKHWRNLNAGDGCOTRREVILAEAVVAPQVAAAGCKLTGGSWRSAYDDVVVTDAAARLDVDHDFVPLAEVYDSEAPWAAARREAYANDQ  
 SPDTLIAVSAASNRKADKPAEWLPSDGSYHCTYAAATWVGTCLRWDLAVDENERQALLGLAEDCPNTTVVYEPAP 998 294 818 Streptomyces roseus HNH endonuclease  
 [Streptomyces roseus]  
 gi |925387131|gb|LGDA01000250.1|:44655-45964 gi |664443183|ref|WP\_030965733.1| gi |664443183|ref|WP\_030965733.1| 233 1 233 2.10e-102  
 LQRGPPALALAALPLLATAPAAHAAGTQAGVPASSGIAGAP-  
 GVRAPLPLFEAIDRIPVADEQREGYKDWLYKHWRNLNATDGCOTRREVILSEAVEAPVVAAGCKMSSGSRSPYGDVVVTDAAAGLDVDHDFVPLAEVHDSGSFAWDVRRREAYANDQASPLTLIAVTAKSNRKADKPAQWIPPASGYHCEYAAQWTA  
 KLRWSLAADDAERQALLGVAEDCPNTTVVYESA MRHGLPALTLALPLLASTPTAHSAPAD---  
 PVRGPAAGGPAGVRAPLPLFEAIDRLPVAEHRDGYKRDLYKHWRNLNAGDGCOTRREVILAEAVTAPVAAAGCKLTSGSWRSAYDNVVSDAARLDVDHDFVPLAEVYDSEQTPWTAARREAYANDQASPLTLIAVSAASNRKADKPAEWLPSDGSYHCTY  
 AATWVGTCLRWDLAVDENERQALLGLAEDCPNTTVVHETAP 998 294 801 Streptomyces sp. NRRL S-378 HNH endonuclease [Streptomyces sp. NRRL S-378]  
 gi |925387131|gb|LGDA01000250.1|:44655-45964 gi |926355608|ref|WP\_053686546.1| gi |926355608|ref|WP\_053686546.1| 232 46 232 1.85e-101  
 LFEAIDRIPVADEQREGYKDWLYKHWRNLNATDGCOTRREVILSEAVEAPVVAAGCKMSSGSRSPYGDVVVTDAAAGLDVDHDFVPLAEVHDSGSFAWDVRRREAYANDQASPLTLIAVTAKSNRKADKPAQWIPPASGYHCEYAAQWTA  
 AADDAERQALLGVAEDCPNTTVVYESA  
 LFEAIDRIPVADEQREGYKDWLYKHWRNLNATDGCOTRREVILAEAVIAPVVAAGCKLTGGSWRSAYDDVGLITDAARLDVDHDFVPLAEVHDSGGYAWDAARREAYANDQASPLTLIAVSAASNRKADKPAQWLPPYDSEAPWAAARREAYANDQ  
 AADDAERQALLGLAEDCPNTTVVYIAP854 294 794 Streptomyces MULTISPECIES: HNH endonuclease [Streptomyces]  
 gi |925387131|gb|LGDA01000250.1|:44655-45964 gi |664052845|ref|WP\_030592179.1| gi |664052845|ref|WP\_030592179.1| 241 45 241 6.65e-98  
 GAPGVRAPLPLFEAIDRIPVADEQREGYKDWLYKHWRNLNATDGCOTRREVILSEAVEAPVVAAGCKMSSGSRSPYGDVVVTDAAAGLDVDHDFVPLAEVHDSGSFAWDVRRREAYANDQASPLTLIAVTAKSNRKADKPAQWIPPASGYHCEYAAQ  
 WTAAKLRWSLAADDAERQALLGVAEDCPNTTVVYESA  
 GAGGLATLPLDAVERIPVAEQRREGYKRELYKHWRNLNAGDGCOTRREVILSEAVEAPVVAAGCKLTGGSWLSAYDDVGTVSDAGLDVDHDFVPLAEVHDSGGYAWDAARREAYANDQASPLTLIAVTAKSNRKADKPAQWLPPAADYRCTYAAE  
 WTGKLRWLAADDAERQALLLAGECPNTTVVYGTAP 884 294 772 Streptomyces globisporus HNH endonuclease [Streptomyces globisporus]  
 gi |925387131|gb|LGDA01000250.1|:44655-45964 gi |1154960293|ref|WP\_078865614.1| gi |1154960293|ref|WP\_078865614.1| 238 20 238 2.19e-97  
 LPLLATAPAAHAAGTQAGVPASSGIAGAPGVRAPLPLFEAIDRIPVADEQREGYKDWLYKHWRNLNATDGCOTRREVILSEAVEAPVVAAGCKMSSGSRSPYGDVVVTDAAAGLDVDHDFVPLAEVHDSGSFAWDVRRREAYANDQASPLTLIAVTAKS  
 NRKADKPAQWIPPASGYHCEYAAQWTAAKLRWSLAADDAERQALLGVAEDCPNTTVVYESA VPAADPTAAKETTTLQVLP-----  
 VQGAANVRAPLALFEAIDRLPVAEHRDGYKRDLYKHWRNLNATDGCOTRREVILAEAVGAPQVAAAGCKLTGTTWRSAYDNLVTDAAARLDVDHDFVPLAEVYDSEQTPWAAARREAYANDQASPLTLIAVSAASNRKADKPAEWLPSDGSYHCTY  
 AATWVGTCLRWDLAVDENERQALLGLAEDCPNTTVVYEPAP 962 294 768 Streptomyces roseus HNH endonuclease [Streptomyces roseus]  
 gi |925387131|gb|LGDA01000250.1|:44655-45964 gi |494479287|ref|WP\_007268764.1| gi |494479287|ref|WP\_007268764.1| 233 41 233 1.87e-96  
 VRAPLPLFEAIDRIPVADEQREGYKDWLYKHWRNLNATDGCOTRREVILSEAVEAPVVAAGCKMSSGSRSPYGDVVVTDAAAGLDVDHDFVPLAEVHDSGSFAWDVRRREAYANDQASPLTLIAVTAKSNRKADKPAQWIPPASGYHCEYAAQWTA  
 KLRWSLAADDAERQALLGVAEDCPNTTVVYESA  
 LRTVPVLYEADRILPVAPVAPVAPVAPVAPVAPVAPVAPVAPVAPVAPVAPVAPVAPVAPVAPVAPVAPVAPVAPVAPVAPVAPVAPVAPVAPVAPVAPVAPVAPVAPVAPVAPVAPVAPVAPVAPVAPVAPVAPVAPVAPVAPVAPVAPVAPVAPVAPVAPVAPV  
 KLRWNLAVDDAERQALLGLAEDCPNTTVVYETAP 872 294 761 Streptomyces sp. C HNH endonuclease [Streptomyces sp. C]



## Spacer 2:

>JQ0001000126.1\_6927\_10067\_28\_spacer\_9569\_35  
AGTCTATTTTGCCTGCTAACGGTTTCAGCATCTC

Hit coordinates:

ContigID: AOUX01000192  
Start: 3802  
Stop: 3836

Intergenic sequence:

>gi|456831403|gb|AOUX01000192.1|:3205-4402 *Leptospira interrogans* serovar Naam str. Naam ctg718000007680, whole genome shotgun sequence

```
TTAGCTCCGCATCTGTCCAACCTTTTTAGGGCGTTTTTTTTAATAGTTTTTTGGTCTGAATTACGTTGGT
CGCGCGATCAGGATAATATTTTCAACCAAATCAACCGTATACGGTGGTAAGACTTTTGACTTCTCGTCC
GTAATTTCAATTTCTTGCGAATCGATCCTTTAATGGTAGCAAAAGGCAATTCAACAGTTTTTTTATTTA
CAAATATTAATTTTTATTATTCAGAATATATTTACGTATTTGTTGTCCAAGCTTTCTTTCAAAAAC
TAATCTCGTTCAGTATTTGTAATTTAGAACGAACAGTTTCAACTCCGCGTTTTTTGTCCCCGTCGATG
CGTTTTAGATCGGATTCGATCTCGATTAATCTTTGAAGTCGTTATTAAGATCCTCTAATGTTTTAGGCG
GTCGGGTTGAACCTCATCGACAGTCTCCTTATTGATTTTTAATCTACTTGCCTCGTTGTCGACTAATA
GTAATTTACGTTTCCCTTTTGGGACCTTTGTTCCCTTTTTTTTCGATCGCCTCAATAACAAGGAGCGATT
AGGTCCTGGGATTAATCTGATTGTTTTATTGTAATCGGAGATGCTGAAACCGTTAGCAGTGCAAAATAGA
CTCATACGGCTATATAATTTGCCTATATGCGCCTTCAGTTCTTCTCGGTGGCCTCCGAAAGTAATCTTT
CTGACTTTTGGGTTTGTGTTGCTCATTGTACATCTATAAATTATAATTACTACTATGGTTAGGCATAAT
AAACGTATTATAAAAAGCTCAAGCATCTAGATCCCAGAAAATATAAAACACAGTTACCCAAATAGCAGCA
GCTAAAAAGATCAAGAATGCTTGTAAAAAGAGATACGCTGTCATAACTTTACAACCCCAAGTGGATT
AACGGAACCCCTGTGATGATGAAGGGCTATAGCGATCAATGAGGCGACGCACTTAAGGCTTGTTTTTTT
GCGTCGGACCGATCCATGTGGAGCTCGTCACCATCACCATCTTTCTGAAAAAATAGATCTGAATGCTCTA
TAGTTTGTAAAGCACGTCTGAAAAGATCATATATCGGCCTCCACCAAACCTGTTTATTGTTCCAAATC
TTAACTGCGTCCGCAATTGATTGCGCAATATTGTGGTTACGCGACAAGAGTGACATCTAACGGCATAGG
CCTTGTTTC
```

Top 10 BLASTX hits: into hypothetical protein

```
# Fields: query id, subject id, subject ids, subject length, s. start, s. end, evalue, query seq, subject seq, q. start, q. end, score, subject sci names, subject title
# 10 hits found
gi|456831403|gb|AOUX01000192.1|:3205-4402 gi|446021850|ref|WP_000099705.1| gi|446021850|ref|WP_000099705.1| 176 1 145 8.09e-94
MSSTRPPKTLLEDLNKRLQRLIEIESDLKRIDGDKNAEVEVRSKFTNTERELVFERESLDKQIRKYILNNKNLIFVNKKTVELPFATIKRIDSQEIEITDEKSKVLPPYTVDLVEKYYPDRATNVIQTKKTIKKNALKSWTDAEL
MSSTRPPKTLLEDLNKRLQRLIEIESDLKRIDGDKNAEVEVRSKFTNTERELVFERESLDKQIRKYILNNKNLIFVNKKTVELPFATIKRIDSQEIEITDEKSKVLPPYTVDLVEKYYPDRATNVIQTKKTIKKNALKSWTDAEL 436
2 735 Leptospira interrogans hypothetical protein [Leptospira interrogans]
gi|456831403|gb|AOUX01000192.1|:3205-4402 gi|488052634|ref|WP_002124031.1| gi|488052634|ref|WP_002124031.1| 176 1 145 3.59e-93
MSSTRPPKTLLEDLNKRLQRLIEIESDLKRIDGDKNAEVEVRSKFTNTERELVFERESLDKQIRKYILNNKNLIFVNKKTVELPFATIKRIDSQEIEITDEKSKVLPPYTVDLVEKYYPDRATNVIQTKKTIKKNALKSWTDAEL
```

MSSTRPPKLTLEDLNKQLRLIEIESDLKRIDGDKNAEVEVTRSKFTNTERELVFERESLDKQIRKYILNNKNLIFVNKKTVELPFATIKRIDSQEIEITDEKSKVLPPYTVDLVEKYYPDRATNVIQTKKTIKKNALKSWTDAEL 436  
2 730 Leptospira interrogans Gam-like protein [Leptospira interrogans]  
gi|456831403|gb|AOUX01000192.1|:3205-4402 gi|516461609|ref|WP\_017850447.1| gi|516461609|ref|WP\_017850447.1| 176 1 145 8.23e-87  
MSSTRPPKLTLEDLNKRLQRLIEIESDLKRIDGDKNAEVEVTRSKFTNTERELVFERESLDKQIRKYILNNKNLIFVNKKTVELPFATIKRIDSQEIEITDEKSKVLPPYTVDLVEKYYPDRATNVIQTKKTIKKNALKSWTDAEL  
MSLTQPPKLTLEDLNKRLQRLIKIDSDLKRIDGDKNAEVEVTRSKFTDTERDLVFERESLDKQVREYILNNKNLIFVNKKTVELPFATIKRIDSQEIEITDEKSKVLPPYTVDLVEKYYPDRATNVIQTKKTIKKTALKSWTGAEL 436  
2 688 Leptospira interrogans hypothetical protein [Leptospira interrogans]  
gi|456831403|gb|AOUX01000192.1|:3205-4402 gi|490915838|ref|WP\_004777741.1| gi|490915838|ref|WP\_004777741.1| 176 1 145 1.75e-79  
MSSTRPPKLTLEDLNKRLQRLIEIESDLKRIDGDKNAEVEVTRSKFTNTERELVFERESLDKQIRKYILNNKNLIFVNKKTVELPFATIKRIDSQEIEITDEKSKVLPPYTVDLVEKYYPDRATNVIQTKKTIKKNALKSWTDAEL  
MSSTQPPKLTLEDLNKRLQRLIEIESDLKRIDGDKNTEVESVRSRFDTERELVFEKENLDKQVREYILNNKDIIFVHKKTVELPFATIKRIDSQEIEITDEKSKTLPPTYVDLVEKYYSRPNVVIQTKKTIKKAALKNWTNAEL 436  
2 640 Leptospira kirschneri Gam-like protein [Leptospira kirschneri]  
gi|456831403|gb|AOUX01000192.1|:3205-4402 gi|487897388|ref|WP\_001970854.1| gi|487897388|ref|WP\_001970854.1| 178 1 147 1.00e-69  
LSMSSTRPPKLTLEDLNKRLQRLIEIESDLKRIDGDKNAEVEVTRSKFTNTERELVFERESLDKQIRKYILNNKNLIFVNKKTVELPFATIKRIDSQEIEITDEKSKVLPPYTVDLVEKYYPDRATNVIQTKKTIKKNALKSWTDAEL  
MSTTQNPQPKLTLEDLNKMQRLVEIESDLKRIEAGEKNSEVESVRSRFDTERDLVFEKEELDKQVRDFVQNKDITLFAHRKTVELPFATIKRIDSQEIEITDEKSKELPPYSVDLIEKFYPERANNAIQIKKTVKKTALKSWTDAEL 442  
2 575 Leptospira interrogans Gam-like protein [Leptospira interrogans]  
gi|456831403|gb|AOUX01000192.1|:3205-4402 gi|1001638526|ref|WP\_061216057.1| gi|1001638526|ref|WP\_061216057.1| 176 1 145 4.86e-69  
MSSTRPPKLTLEDLNKRLQRLIEIESDLKRIDGDKNAEVEVTRSKFTNTERELVFERESLDKQIRKYILNNKNLIFVNKKTVELPFATIKRIDSQEIEITDEKSKVLPPYTVDLVEKYYPDRATNVIQTKKTIKKNALKSWTDAEL  
MNAATQPKLTLEDLNARLQRLVEIEANLKRIGGDKNTEVESVRSRFDTERDLVFEKEQLDRQVREFVLQNKDITLFAHRKTIELPFATIKRIDSQEIEITDEKSKTLPYSVDLIEKFYPERASDAIQIKKSIKKAALKSWTDAEL 436  
2 571 Leptospira santarosai Gam-like protein [Leptospira santarosai]  
gi|456831403|gb|AOUX01000192.1|:3205-4402 gi|490641537|ref|WP\_004506532.1| gi|490641537|ref|WP\_004506532.1| 178 1 147 1.55e-67  
LSMSSTRPPKLTLEDLNKRLQRLIEIESDLKRIDGDKNAEVEVTRSKFTNTERELVFERESLDKQIRKYILNNKNLIFVNKKTVELPFATIKRIDSQEIEITDEKSKVLPPYTVDLVEKYYPDRATNVIQTKKTIKKNALKSWTDAEL  
MNRAPNPQPKLTLEDLNKMQRLIEIKSDLKRIEAGEKNTEVESIRSRFVGRDLVFEKEELDKQVREFVQNKDITLFAHRKTIELPFATIKRIDSQEIEITDEKSKTLPYSVDLIEKFYPERANNAIQIKKSVKKTALKSWTDAEL 442  
2 561 Leptospira weilii Gam-like protein [Leptospira weilii]  
gi|456831403|gb|AOUX01000192.1|:3205-4402 gi|515129273|ref|WP\_016758123.1| gi|515129273|ref|WP\_016758123.1| 177 8 146 1.70e-65  
PKTLEDLNKRLQRLIEIESDLKRIDGDKNAEVEVTRSKFTNTERELVFERESLDKQIRKYILNNKNLIFVNKKTVELPFATIKRIDSQEIEITDEKSKVLPPYTVDLVEKYYPDRATNVIQTKKTIKKNALKSWTDAEL  
PKSLEDLNIRMQRLEIESDLKRIEAGEKNTEVEDTRSHFVEVERDLVFEKERLDKQIRAFVMMENKNTLFAHRKTIELPFATIKRIDSQEIEITDEKSKTLPYSVDLIEKFYPERANNAIQIKKSVKKTALKSWTDAEL 418 2  
547 Leptospira MULTISPECIES: hypothetical protein [Leptospira]  
gi|456831403|gb|AOUX01000192.1|:3205-4402 gi|516465861|ref|WP\_017854324.1| gi|516465861|ref|WP\_017854324.1| 103 1 103 6.90e-64  
MSKQTQKSERLLSEATEKKLKAHIGKLYSRMSLFCTANGFSISDYNKTIIRLIPGPKSLLVIEAIEKKGTKVPGKRRKLLLDNERASRLKINKETVDEFNPTA 725 417 529 Leptospira  
interrogans hypothetical protein [Leptospira interrogans]  
gi|456831403|gb|AOUX01000192.1|:3205-4402 gi|516474782|ref|WP\_017863226.1| gi|516474782|ref|WP\_017863226.1| 176 1 145 1.48e-61  
MSSTRPPKLTLEDLNKRLQRLIEIESDLKRIDGDKNAEVEVTRSKFTNTERELVFERESLDKQIRKYILNNKNLIFVNKKTVELPFATIKRIDSQEIEITDEKSKVLPPYTVDLVEKYYPDRATNVIQTKKTIKKNALKSWTDAEL  
MNAATQPKLTLEDLNARLQRLVEIEANLKRIDGDKNTEVESVRSRFDTERDLVFEKEQLDRQVREFVLQNKDITLFAHRKTIELPFATIKRIDSQEIEITDEKSKTLPYSVDLIEKFYPERVSDAIQIKKLIKTTALKSWTDAEL 436  
2 521 Leptospira santarosai hypothetical protein [Leptospira santarosai]

### Spacer 3:

>HG916826.1\_842637\_846204\_26\_spacer\_844192\_32  
TACATCAGCAAGGACGGCCCGGACATGATCCC

Hit coordinates:

ContigID: LMMB01000004

Start: 84179

Stop: 84210

Intergenic sequence:

>gi|944790866|gb|LMMB01000004.1|:84017-84790 Pseudomonas sp. Leaf83 contig\_12, whole genome shotgun sequence  
TGTACAAGCCAGTATTTCCGGGGTTC TAGCCGGATCGCTTCTCAGATGGGAGCGTTTTGGGAACACTTT  
GGGAATGGTGGAACGAAAAAGGCAGCCTGCGAGGGCTGCCTTTTGTCTGTTTCTAGGGCCTGGATTACAG  
CTTTAGCGCGTCTCCAGGAGCGGGATCATGTCCGGGCCGTCTTGCTGATGTA CTGACTTGCCGTAATGACGT  
TCGAGCATTGCGATTGTCTGTGCTTCCATACGGCTGACGCAGGCTGGGCAGAGGCAC TTGTAACCGCCG  
CTGTTGGTGGTCATGGCTGGGGCTTCTGTGCAGGGCAGGATGGCGCCCACTTCGGCGTGGCGCGCGGC  
GATGTGCTGGCGGTGGGCGGTGATGATGCTGGCCAGCTCGGCTTCGTCGATTTGCCCGTCTTCCAGGGCC  
TTGAGGATCATCGCTCGACCTTGCCCGCTTTACCGCCGTGCCATGGCGCGGGCCAGCAGGTCAATGT  
TGTCCTGTCTGT CAGCTCGGGCAGGGGACGTAACCGCCGTTGTAGAGGCTGGTGAGGTAGTCGGGCAGA  
TAGCTGGTGC CGGCACCTTCTCCAGCTGGCGCACTTGTTCGTCCGTCAGCGGGCGGTTGCCGGGTTCT  
CGTACAGCTTGTGTGCAACTGCTTGAGGTCCAGCCCCGGGCAGGTGGCGGCGCATTCGCGGCCCCCTGG  
GAAGGCGCCCCGGTGAGGGGGAATGCGAGGGCGATATCGGCAAGGCCGTGCTGGTGGGCGATCCGTTGTG  
AATC

### Top 10 BLASTX hits: into hypothetical protein

# Fields: query id, subject id, subject ids, subject length, s. start, s. end, evalue, query seq, subject seq, q. start, q. end, score, subject sci names, subject title  
# 20 hits found

| Query ID                                    | Subject ID                      | Subject IDs                     | Subject Length | s. start | s. end | evalue   | Query Seq                                                                   | Subject Seq                                                                   | q. start | q. end | score | Subject Sci Names        | Subject Title                                   |
|---------------------------------------------|---------------------------------|---------------------------------|----------------|----------|--------|----------|-----------------------------------------------------------------------------|-------------------------------------------------------------------------------|----------|--------|-------|--------------------------|-------------------------------------------------|
| gi 944790866 gb LMMB01000004.1 :84017-84790 | gi 980973412 ref WP_059392489.1 | gi 980973412 ref WP_059392489.1 | 156            | 83       | 156    | 1.47e-63 | LPELTDNDIDLLARAMGTAVKRGKVDAMILKALEDDGQIDEAELASII TAHRQHIAARHAEVGAIALLHRKPQP | MPEPADTDNDIDLLARAMGTAVKRGKVDAMILKALEDDGQIDEAELASII TAHRQHIAARHAEVGAIALLHRKPQP | 515      | 294    | 355   | Pseudomonas toytomiensis | hypothetical protein [Pseudomonas toytomiensis] |
| gi 944790866 gb LMMB01000004.1 :84017-84790 | gi 980973412 ref WP_059392489.1 | gi 980973412 ref WP_059392489.1 | 156            | 18       | 85     | 1.47e-63 | GAFPGGRECAATCPGLDLKQFDNKL YENPGNRPLTDEQVRQLEKVAGTSYLPDYLTSLYNGVYVPCPS       | AAFPGGRECAATCLGLDLKQFDNKL YENPGHRPLTDEQVRQLEKVAGTSYLPDYITGLYNGVVFAMPE         | 709      | 506    | 327   | Pseudomonas toytomiensis | hypothetical protein [Pseudomonas toytomiensis] |
| gi 944790866 gb LMMB01000004.1 :84017-84790 | gi 545127478 ref WP_021488921.1 | gi 545127478 ref WP_021488921.1 | 155            | 82       | 155    | 2.10e-63 | LPELTDNDIDLLARAMGTAVKRGKVDAMILKALEDDGQIDEAELASII TAHRQHIAARHAEVGAIALLHRKPQP | MPELTDNDIDLLARAMGTAVKRGKVDAMILRALEDGQIDEAELASII TAHRQHIAARHAEVGAIALLHRKPQP    | 515      | 294    | 367   | Pseudomonas mendocina    | hypothetical protein [Pseudomonas mendocina]    |
| gi 944790866 gb LMMB01000004.1 :84017-84790 | gi 545127478 ref WP_021488921.1 | gi 545127478 ref WP_021488921.1 | 155            | 18       | 84     | 2.10e-63 | GAFPGGRECAATCPGLDLKQFDNKL YENPGNRPLTDEQVRQLEKVAGTSYLPDYLTSLYNGVYVPCPS       | AAFPGGRECAA-CLGLDLKQFDNKL YENPGHRPLTDEQVRQLEKVAGTYYLPDYLTSLYNGVVFAMPE         | 709      | 506    | 313   | Pseudomonas mendocina    | hypothetical protein [Pseudomonas mendocina]    |
| gi 944790866 gb LMMB01000004.1 :84017-84790 | gi 917193888 ref WP_051800600.1 | gi 917193888 ref WP_051800600.1 | 156            | 83       | 156    | 2.14e-62 | LPELTDNDIDLLARAMGTAVKRGKVDAMILKALEDDGQIDEAELASII TAHRQHIAARHAEVGAIALLHRKPQP | MPEPADTDNDIDLLARAMGTAVKRGKVDAMILKALEDDGQIDEAELASII TAHRQHIAARHAEVGAIALLHRKPQP | 515      | 294    | 355   | Pseudomonas oleovorans   | hypothetical protein [Pseudomonas oleovorans]   |
| gi 944790866 gb LMMB01000004.1 :84017-84790 | gi 917193888 ref WP_051800600.1 | gi 917193888 ref WP_051800600.1 | 156            | 18       | 85     | 2.14e-62 | GAFPGGRECAATCPGLDLKQFDNKL YENPGNRPLTDEQVRQLEKVAGTSYLPDYLTSLYNGVYVPCPS       | AAFPGGRECAAACLGLDLKQFDNKL YENPGHRPLTDEQVRQLEKVAGTSYLPDYITGLYNGVVFAMPE         | 709      | 506    | 317   | Pseudomonas oleovorans   | hypothetical protein [Pseudomonas oleovorans]   |

|                                                                            |                                                                              |                                 |     |     |     |                       |
|----------------------------------------------------------------------------|------------------------------------------------------------------------------|---------------------------------|-----|-----|-----|-----------------------|
| gi 944790866 gb LMMB01000004.1 :84017-84790                                | gi 835622920 ref WP_047589232.1                                              | gi 835622920 ref WP_047589232.1 | 156 | 83  | 156 | 8.82e-60              |
| LPELTDNIDLLARAMGTAVKRGKVDAMILKALEDGQIDEAELASIIIAHRQHIAARHAEVGAIALHRKPQP    | MPELADTDNIDLLARAMGTTIKRGTVDAEILKALEDGEISEAELASIIAAHRQHIAARHAEVGAIALHRKPQP    |                                 |     |     |     | 515                   |
| 294 331 Pseudomonas mendocina                                              | hypothetical protein [Pseudomonas mendocina]                                 |                                 |     |     |     |                       |
| gi 944790866 gb LMMB01000004.1 :84017-84790                                | gi 835622920 ref WP_047589232.1                                              | gi 835622920 ref WP_047589232.1 | 156 | 18  | 84  | 8.82e-60              |
| GAFPGGRECAATCPGLDLKQFDNKLLENPGRPLTDEQVRQLEKQVAGTSYLPDYLTSLYNGVYVPCP        | AAFPGGRECAATCLGLDLKQFDNKLLENPGRPLTDEQVLQLEKQVAGTSYLPDYISGLYNGVYVAMP          |                                 |     |     |     | 709                   |
| 509 318 Pseudomonas mendocina                                              | hypothetical protein [Pseudomonas mendocina]                                 |                                 |     |     |     |                       |
| gi 944790866 gb LMMB01000004.1 :84017-84790                                | gi 503480628 ref WP_013715289.1                                              | gi 503480628 ref WP_013715289.1 | 159 | 18  | 84  | 3.53e-53              |
| GAFPGGRECAATCPGLDLKQFDNKLLENPGRPLTDEQVRQLEKQVAGTSYLPDYLTSLYNGVYVPCP        | AAFPGGRECAATWGLDLKQFDNKLLENPGRPLTDEQVLQLEKQVAGTSYLPDYISGLYNGVYVAMP           |                                 |     |     |     | 709                   |
| 509 313 Pseudomonas mendocina                                              | hypothetical protein [Pseudomonas mendocina]                                 |                                 |     |     |     |                       |
| gi 944790866 gb LMMB01000004.1 :84017-84790                                | gi 503480628 ref WP_013715289.1                                              | gi 503480628 ref WP_013715289.1 | 159 | 83  | 159 | 3.53e-53              |
| LPELTDNIDLLARAMGTAVKRGKVDAMILKALEDGQIDEAELASIIIAHRQHIAARHAEVGAIALHRKPQP*PP | MPELAELDNIDLLERAMTTTIKRGTVDAMILTALKDGEINEAELASIIAHRQHMAARHAEVSSILALHSKRQEPKP |                                 | 515 | 285 | 279 | Pseudomonas mendocina |
| protein [Pseudomonas mendocina]                                            |                                                                              |                                 |     |     |     | hypothetical          |

## Spacer 4:

>LFQC01000004.1\_87106\_87459\_1\_spacer\_87136\_35  
GTAACAGATGATATTAATTCAAAGAATTAAGCTT

Hit coordinates:

ContigID: AOSX01000029

Start: 620311

Stop: 620345

Intergenic sequence:

>gi|727535586|gb|AOSX01000029.2|:619946-620968 Clostridium botulinum Af84 Contig\_29, whole genome shotgun sequence  
AAATTCGGATAGAAACATAGATATTTCTCATATAGATTTTTTTGATTAATTATATGCACTGATGCTATGA  
ATAAAAACAAAAAATTCTAAAAGTTTTCCAACCGCATTAAATTTTAAAACCTATCCTAAGCATTGCAA  
TATAAGGCTTAAGATAGGTTTTGTTTATGTTTTCTGAAAAATCACAAATGGCTGGAAAAATTTTTTAA  
TCATTGTAAAATCAAATGCATATGCTATTCCTTAAAATTAAGGAATGGCTAATTTACTATGGATGAACAT  
TAACATAGGATGATTTAAATTTGGAAAAGCTTACTAGATTTCTTACCTATATCGGGTTGAACAATAACAT  
GAGATGCATTTAAATAAGTTAATTCCTTTGAATTAATATCATCTGTTACACTGAACAATAACATAAGAT  
GTATTATTAATAAATGGTAGTTGTAGCTTATGTTATAGCTATTATTTTTCAATATTTAGAGGAATTTTTT  
ACATATGTAGAATATTTGTATATAGTCCCTTAATTCATTATCAAATCTTCTTGAATAAAAAGGAGCCT  
GTGTATGCAGTGGGGCTCCTTTTTTATATTATTTGAAGGAATTTTTAACATTTATAGAATATTAATA  
TAACGGCTTCCCAATAGGTTGATTATAGACCTCTTGCTTAAGCAAAAAGAACCCCAATAAAAAGGGGTT  
CTTTTTGTATGGATTTATATTGGTGCTATGTATTGGTCTATTTTTACTATATCCAGATGTAGAAAAGT  
TAATCAGTAAGAAATATATAAGATGTAATTTTTAAATGTATTTCTATAATGAGAGTACCTTATTTTTTA  
TTTTTTTGATAAAAATTTAAGAAAATTAGCAATTTATTAATAAAAATTTAAAATAATTATTTAATTTCA  
TTTTAAAGTTGTATCAGAATGTATAAAAAGTAAAAGATGTAGGATAAACAAGAAGGAATTGAATTA  
TTGTAAGAATATAAATATTATGGTAAAAATATAAATAAATA

Top 10 BLASTX hits: (1 hit found) into hypothetical protein

# Fields: query id, subject id, subject ids, subject length, s. start, s. end, evalue, query seq, subject seq, q. start, q. end, score, subject sci names, subject title

# 1 hits found

|                                               |                                                                      |                                  |     |     |                       |
|-----------------------------------------------|----------------------------------------------------------------------|----------------------------------|-----|-----|-----------------------|
| gi 727535586 gb AOSX01000029.2 :619946-620968 | gi 1119667520 ref WP_072587154.1                                     | gi 1119667520 ref WP_072587154.1 | 80  | 49  |                       |
| 79                                            | 2.91e-07VTLNNNIRCIKNGSCSLCYSYYFSIFRGIF LKLNNNIRCIKNGSCSLCYSYYFSLFRRI | 396                              | 488 | 136 | Clostridium botulinum |
|                                               | hypothetical protein [Clostridium botulinum]                         |                                  |     |     |                       |



|                                                                     |                                                         |     |          |          |
|---------------------------------------------------------------------|---------------------------------------------------------|-----|----------|----------|
| gi 393068133 gb AKOR01000006.1 :34315-34513                         | gi 446797338 ref WP_000874594.1                         |     |          |          |
| gi 446797338 ref WP_000874594.1  2399                               | 258                                                     | 323 | 3.26e-31 |          |
| QTSFNQGTYNFSNSATLSFNNSNFNQGTYHFNSAQSTFENSNFNQGTYNFNDNTSFNNDTFNQGAY  |                                                         |     |          |          |
| QTSFNQGTYNFSNSATLSFNNSNFNQGTYHFNSAQSTFENSNFNQGTYNFNDNTSFNNDTFNQGTY  | 1                                                       | 198 | 307      |          |
| Helicobacter pylori                                                 | toxin-like outer membrane protein [Helicobacter pylori] |     |          |          |
| gi 393068133 gb AKOR01000006.1 :34315-34513                         | gi 446797381 ref WP_000874637.1                         |     |          |          |
| gi 446797381 ref WP_000874637.1  2529                               | 258                                                     | 323 | 1.63e-30 |          |
| QTSFNQGTYNFSNSATLSFNNSNFNQGTYHFNSAQSTFENSNFNQGTYNFNDNTSFNNDTFNQGAY  |                                                         |     |          |          |
| QTSFNQGTYNFSNSATLSFNNSNFNQGTYHFNSTQSTFENSNFNQGTYNFNDNTSFNNDTFNQGTY  | 1                                                       | 198 | 302      |          |
| Helicobacter pylori                                                 | toxin outer membrane protein [Helicobacter pylori]      |     |          |          |
| gi 393068133 gb AKOR01000006.1 :34315-34513                         | gi 446797342 ref WP_000874598.1                         |     |          |          |
| gi 446797342 ref WP_000874598.1  2399                               | 258                                                     | 323 | 2.63e-30 |          |
| QTSFNQGTYNFSNSATLSFNNSNFNQGTYHFNSAQSTFENSNFNQGTYNFNDNTSFNNDTFNQGAY  |                                                         |     |          |          |
| QTSFNQGTYDFNSNSATLSFNNSNFNQGTYHFNSAQSTFENSNFNQGAYNFNDNTSFNNDTFNQGTY | 1                                                       | 198 | 301      |          |
| Helicobacter pylori                                                 | toxin outer membrane protein [Helicobacter pylori]      |     |          |          |
| gi 393068133 gb AKOR01000006.1 :34315-34513                         | gi 1159760846 ref WP_079307344.1                        |     |          |          |
| gi 1159760846 ref WP_079307344.1                                    | 2397                                                    | 259 | 324      | 3.32e-30 |
| QTSFNQGTYNFSNSATLSFNNSNFNQGTYHFNSAQSTFENSNFNQGTYNFNDNTSFNNDTFNQGAY  |                                                         |     |          |          |
| QTSFNQGTYNFSNSATLSFGNSNFNQGTYHFNSAQSTFENSNFNQGTYNFNDNVSFNNDTFNQGTY  | 1                                                       | 198 | 300      |          |
| Helicobacter pylori                                                 | toxin [Helicobacter pylori]                             |     |          |          |

## Predicted CRISPR-Array: 2

ContigID: KK099646.1 (Staphylococcus\_aureus\_DAR3163\_GCA\_000610585.1)  
Start: 60277  
Stop: 60684  
<https://www.ncbi.nlm.nih.gov/projects/sviewer/?id=KK099646.1&v=60277..60684>  
Predicted in: serine-aspartate repeat-containing protein

CRISPR-Finder prediction:

### CRISPR id : tmp\_1\_PossibleCrispr\_1

- CRISPR start position : 1 ----- CRISPR end position : 132 ----- CRISPR length : 131
- DR consensus : AGCGATTCAGACTCAGATAGCGACTCAGA
- DR length : 29 Number of spacers : 2

```
1 AGTGACTCAGATTCGGACAGCGATTCAGA CTCAGATAGCGACTCAGATTCAGAT 54
55 AGTGACTCAGACTCAGATAGCGACTCAGA CTCAGATAGCGACTCAGAC 102
103 TCAGATAGCGACTCAGACAGCGACTCAGA 132
```

### CRISPR id : tmp\_1\_PossibleCrispr\_2

- CRISPR start position : 278 ----- CRISPR end position : 408 ----- CRISPR length : 130
- DR consensus : AGCGATTCAGACTCAGATAGCGACTCAGA
- DR length : 29 Number of spacers : 2

```
278 AGCGATTCAGATTCAGACAGCGACTCAGA TTCAGATAGCGACTCAGACTCAGAC 331
332 AGCGATTCAGACTCAGATAGCGACTCAGA CAGCGATTCAGATTCGGAT 379
380 AGCGATTCAGATTCAGATGCAGGTAACA 408
```

Top 10 BLASTX results in RefSeq:

# Fields: query id, subject id, subject ids, subject length, s. start, s. end, evalue, query seq, subject seq, q. start, q. end, score, subject sci names, subject title  
# 587 hits found

```
gi|601598167|gb|KK099646.1|:60277-60684 gi|1093956063|ref|WP_070956199.1|
  gi|1093956063|ref|WP_070956199.1| 1426 1225 1281 7.54e-09
  SDSDSDSDSDSDSDSDSDSDSDSDSDSDSDSDSDSDSDSDSDSDSDS
  SDSDSDSDSDSDSDSDSDSDSDSDSDSDSDSDSDSDSDSDSDSDS
  aureus hydrolase [Staphylococcus aureus] 171 150 Staphylococcus
gi|601598167|gb|KK099646.1|:60277-60684 gi|1093956063|ref|WP_070956199.1|
  gi|1093956063|ref|WP_070956199.1| 1426 1227 1283 7.54e-09
  SDSDSDSDSDSDSDSDSDSDSDSDSDSDSDSDSDSDSDSDSDSDS
  SDSDSDSDSDSDSDSDSDSDSDSDSDSDSDSDSDSDSDSDSDSDS
  aureus hydrolase [Staphylococcus aureus] 171 150 Staphylococcus
gi|601598167|gb|KK099646.1|:60277-60684 gi|1093956063|ref|WP_070956199.1|
  gi|1093956063|ref|WP_070956199.1| 1426 1229 1285 7.54e-09
  SDSDSDSDSDSDSDSDSDSDSDSDSDSDSDSDSDSDSDSDSDSDS
  SDSDSDSDSDSDSDSDSDSDSDSDSDSDSDSDSDSDSDSDSDSDS
  aureus hydrolase [Staphylococcus aureus] 171 150 Staphylococcus
gi|601598167|gb|KK099646.1|:60277-60684 gi|1093956063|ref|WP_070956199.1|
  gi|1093956063|ref|WP_070956199.1| 1426 1231 1287 7.54e-09
  SDSDSDSDSDSDSDSDSDSDSDSDSDSDSDSDSDSDSDSDSDSDS
  SDSDSDSDSDSDSDSDSDSDSDSDSDSDSDSDSDSDSDSDSDSDS
  aureus hydrolase [Staphylococcus aureus] 171 150 Staphylococcus
```





```

gi|451810799|gb|ANAE01000140.1|:57689-58634      gi|485835026|ref|WP_001446733.1|
gi|485835026|ref|WP_001446733.1|;gi|218706248|ref|YP_002413767.1| 172      2      167      1.36e-11
RCSAGARAGP--SPRARGSRHPHGHLHLHRSIPACAGLTHILALVGTSPVHPRVRGAHAHLGVGGDFATGSPRARGSP-----
TSWRWWGLRHRSSIPACAGLT--HILALVGTSPVHPRVRGAHPHLGVGGDFATGSPRARGSPTSWRWWGLRHRSSIPACAGLTHILA
KWSSTATVGPGLSPLARGTRWWRGQTEQSRRFIPAGAGNTLTYNTENHTLTVYPRWRGEHGHSPKQTQEVNGLSPLARGTPGFHLSKCMW-----
RFIPAGAGNTTPDIFATVVT--PVYPRWRGEHRNQTQRANGVAGLSPLARGTLALFLSGESRHRFIPAGAGNTYFLS      223      714      174
Escherichia coli;Escherichia coli UMN026 hypothetical protein [Escherichia coli]
gi|451810799|gb|ANAE01000140.1|:57689-58634      gi|485835026|ref|WP_001446733.1|
gi|485835026|ref|WP_001446733.1|;gi|218706248|ref|YP_002413767.1| 172      12      167      2.32e-10
GSPRARGSRAGHRWRVAGRSIPACAGLTRALALVGTSPVHPRVRGAHPHLGVGGDFATGSPRARGSRHRTVLGSCASRSIPACAGLTSSTWPPP
TPTPVHPRVRGAHPHLGVGGDFATGSPRARGSRHRTVLGSCASRSIPACAGLTHILA
GLSPLARGTRWWRGQTEQSRRFIPAGAGNTLTYNTENHTLTVYPRWRGEHGHSPKQTQEVNGLSPLARGTPGFHLSKCMWRFIPAGAGNTTPDIFAT
VVTPVYPRWRGEHRNQTQRANGVAGLSPLARGTLALFLSGESRHRFIPAGAGNTYFLS      3      470      165      Escherichia
coli;Escherichia coli UMN026 hypothetical protein [Escherichia coli]
gi|451810799|gb|ANAE01000140.1|:57689-58634      gi|485835026|ref|WP_001446733.1|
gi|485835026|ref|WP_001446733.1|;gi|218706248|ref|YP_002413767.1| 172      12      167      1.15e-09
GSPRARGSPTSWRWW---GLRHRSSIPACAGLTHILALVGTSPVHPRVRGAHPHLGVGGDFATGSPRARGSP-----
TSWRWWGLRHRSSIPACAGLT--HILALVGTSPVHPRVRGAHPHLGVGGDFATGSPRARGSPTSWRWWGLRHRSSIPACAGLTHILA      GLSPLARGT----
RWWRGQTEQSRRFIPAGAGNTLTYNTENHTLTVYPRWRGEHGHSPKQTQEVNGLSPLARGTPGFHLSKCMW-----RFIPAGAGNTTPDIFATVVT--
PVYPRWRGEHRNQTQRANGVAGLSPLARGTLALFLSGESRHRFIPAGAGNTYFLS      430      897      160      Escherichia
coli;Escherichia coli UMN026 hypothetical protein [Escherichia coli]
gi|451810799|gb|ANAE01000140.1|:57689-58634      gi|485835026|ref|WP_001446733.1|
gi|485835026|ref|WP_001446733.1|;gi|218706248|ref|YP_002413767.1| 172      12      167      1.82e-08
GSPRARGSLVPRWW---GLRHRSSIPACAGLTHILALVGTSPVHPRVRGAHVIGRCSAGARAGSPRARGSRHPHGHLHLHRSIPACAGLT--
HILALVGTSPVHPRVRGAHAHLGVGGDFATGSPRARGSPTSWRWWGLRHRSSIPACAGLTHILA      GLSPLARGT----
RWWRGQTEQSRRFIPAGAGNTLTYNTENHTLTVYPRWRGEHGHSPKQTQEVNGLSPLARGTPGFHLSKCMWRFIPAGAGNTTPDIFATVVT--
PVYPRWRGEHRNQTQRANGVAGLSPLARGTLALFLSGESRHRFIPAGAGNTYFLS      64      531      151      Escherichia
coli;Escherichia coli UMN026 hypothetical protein [Escherichia coli]
gi|451810799|gb|ANAE01000140.1|:57689-58634      gi|485835026|ref|WP_001446733.1|
gi|485835026|ref|WP_001446733.1|;gi|218706248|ref|YP_002413767.1| 172      12      163      3.34e-08
GSPRARGSPTSWRWW---GLRHRSSIPACAGLTHILALVGTSPVHPRVRGAHPHLGVGGDFATGSPRARGSP-----
TSWRWWGLRHRSSIPACAGLT--HILALVGTSPVHPRVRGAHPHLGVGGDFATGSPRARGSPTSWRWWGLRHRSSIPACAGLT      GLSPLARGT----
RWWRGQTEQSRRFIPAGAGNTLTYNTENHTLTVYPRWRGEHGHSPKQTQEVNGLSPLARGTPGFHLSKCMW-----RFIPAGAGNTTPDIFATVVT--
PVYPRWRGEHRNQTQRANGVAGLSPLARGTLALFLSGESRHRFIPAGAGNT      491      946      149      Escherichia
coli;Escherichia coli UMN026 hypothetical protein [Escherichia coli]
gi|451810799|gb|ANAE01000140.1|:57689-58634      gi|485668974|ref|WP_001310069.1|
gi|485668974|ref|WP_001310069.1|;gi|218706249|ref|YP_002413768.1| 126      12      122      6.39e-06
GSPRARGSRAGHRWRVAGRSIPACAGLTRALALVGTSPVHPRVRGAHPHLGVGGDFATGSPRARGSRHRTVLGSCASRSIPACAGLTSSTWPPP
TPTPVHPRVRGAH
GLSPLARGTRIFYRRMSRGNRFIPAGAGNTSAAPANVSAVTVYPRWRGEHPRPSIISCASFGLSPLARGTHQEADESARHARFIPAGAGNTQFHMSRR
AGSSVYPRWRGEH      3      335      130      Escherichia coli;Escherichia coli UMN026 hypothetical protein
[Escherichia coli]
# BLAST processed 1 queries

```

## Predicted CRISPR-Array: 4

ContigID: KQ087587.1 (Enterobacter\_aerogenes\_UCI97\_GCA\_001030185.1)

Start: 84822

Stop: 86069

<https://www.ncbi.nlm.nih.gov/projects/sviewer/?id=KQ087587.1&v=84822..86069>

PilerCR predicted Array

>gi|844486473|gb|KQ087587.1|:84822-86069 Enterobacter aerogenes strain UCI97 genomic scaffold aeuqd-supercont1.1, whole genome shotgun sequence

GCGCCTTATCCGGGCTACGGTTCGGTATTTGGTTGGTAGCCCCGGTAAGCGTAAGCGCCACCGGGGAGG  
ATTCCCGGATAGCGGCGGTAGCGCCTTATCCGGGCTACGGTTCGGTATGCGGTTGGTAGCCCCGGTAAG  
CGTAAGCGCCACCGGGGAGGGTTCGGGATGGCGGCGCATAGCGCCTTATCCGGGCTACGGTTCGGTAG  
TCGGTTGGTAGCCCCGGTAAGCGTAAGCGCCACCGGGGAGGGTTCGGGATGGCGGCGCATGGCGCCTTA  
TCCGGGCTACGGTTCGGTATTCGGTCGGTAGCCCCGGTAAGCGTAAGCGCCACCGGGGAGGATTCGGGA  
TAGCGGCGCATCGCGCCTTATCCGGGCTACGATTTCGGTATTCGGTTGGTAGCTCCGGTAAGCGTAAGCGC  
CACCGGGGAGGGTTCGGGATGGCGGCGCNNNNNNNNNNNNNNNNNNNNNNNNNNNNNNNNNNNNNNNNNN  
NNNNNNNNNNNNNNNNNNNNNNNNNNNNNNNNNNNNNNNNNNNNNNNNNNNNNTAAACTGCGC  
GCGTGGGTCGCCAGCTTCGGCCTGCTGTTGGTATTGGCTGCCCGGATCCGCAGCGTCTGCGGCGAAGCTT  
GTCAGCGCCAGCAGTAAATAGAGGTATTTCAATTTTTTATTATCAATAAGGGAGACCCCGCAGTATAAA  
GGCGGGCGGAAAAGAAGAAAATGGCGGGAATTAGCGGGTGAATACCCGGATAGCGGCGCATAGCGCCTT  
ATCCGGGCTACGGTTCGGTATTTGGTTGGTAGCCCCGGTAAGCGTAAGCGCCACCGGGGAGGATTCGGG  
GATAGCGGCGCGTACGCGCCTTATCCGGGCTACGGTTCGGTATTCGGTTGGTAGCCCCGGTAAGCGTAAGC  
GCCACCGGGGAGGGTTCGGGATGGCGGCGCATAGCGCCTTATCCGGGCTACGGTTCGGTAGTCGGTTG  
GTAGCCCCGGTAAGCGTAAGCGCCACCGGGGAGGGTTCGGGATGGCGGCGCATGCGCCTTATCCGGGCT  
TACGGTTCGGTATTCGGTCGGTAGCCCCGGTAAGCGTAAGCGCCACCGGGGAGGATTCGGGATAGCGGC  
GCATCGCGCCTTATCCGGGCTACGATTTCGGTATTCGGTTGGTAGCTCCGGTAAGCGTAAGCGCCACCGG  
GAGGGTTCGGGATGGCGGCGCATAGCGCCTTATCCGGGCTACGGTTCGGTAGTCGGT

Top 10 BLASTX results in RefSeq:

# Fields: query id, subject id, subject ids, subject length, s. start, s. end, evalue, query seq, subject seq, q. start, q. end, score, subject sci names, subject title

# 99 hits found

gi|844486473|gb|KQ087587.1|:84822-86069 gi|1172898100|ref|WP\_080967648.1|  
gi|1172898100|ref|WP\_080967648.1| 135 11 135 2.47e-77  
RLPNRSPDKALCAAIREPSPVALTLTGATNRIIPNRSPDKARCAAIREPSPVALTLTGATDRIPNRSPDKAPCAAIREPSPVALTLTGATNRLPNRSPD  
KALCAAIREPSPGGAYAYRGYQPHTEP  
RLPNRSPDKALCAAIREPSPVALTLTGATNRIIPNRSPDKARCAAIREPSPVALTLTGATDRIPNRSPDKAPCAAIREPSPVALTLTGATNRLPNRSPD  
KALCAAIREPSPGGAYAYRGYQPHTEP 1246 872 623 Enterobacter aerogenes hypothetical protein  
[Klebsiella aerogenes]  
gi|844486473|gb|KQ087587.1|:84822-86069 gi|1172898100|ref|WP\_080967648.1|  
gi|1172898100|ref|WP\_080967648.1| 135 23 135 2.63e-68  
AAIREPSPVALTLTGATNRIIPNRSPDKARCAAIREPSPVALTLTGATDRIPNRSPDKAPCAAIREPSPVALTLTGATNRLPNRSPDKALCAAIREPSP  
GGAYAYRGYQPHTEP  
AAIREPSPVALTLTGATNRIIPNRSPDKARCAAIREPSPVALTLTGATDRIPNRSPDKAPCAAIREPSPVALTLTGATNRLPNRSPDKALCAAIREPSP  
GGAYAYRGYQPHTEP 447 109 563 Enterobacter aerogenes hypothetical protein [Klebsiella  
aerogenes]  
gi|844486473|gb|KQ087587.1|:84822-86069 gi|1172898100|ref|WP\_080967648.1|  
gi|1172898100|ref|WP\_080967648.1| 135 11 135 1.27e-18  
RLPELPTFYRIVARIRRDAPLSGNPPRWRLRPLPTEYRTVARIRRHAPPSGNPPRWRLRPLPTEYRTVARIRRYAPPSGNPPVALTLTGATNR  
IPNRSPDKALRAAIREPSPGGAYAYRGYQPHTEP  
RLPNRSPDKALCAAIREPSPVALTLTGATNRIIPNRSPDKARCAAIREPSPVALTLTGATDRIPNRSPDKAPCAAIRE-----  
PSPVALTLTGATNRLPNRSPDKALCAAIREPSPGGAYAYRGYQPHTEP 413 18 225 Enterobacter aerogenes  
hypothetical protein [Klebsiella aerogenes]  
gi|844486473|gb|KQ087587.1|:84822-86069 gi|1172898100|ref|WP\_080967648.1|  
gi|1172898100|ref|WP\_080967648.1| 135 11 135 1.60e-18  
RLPELPTFYRIVARIRRDAPLSGNPPRWRLRPLPTEYRTVARIRRHAPPSGNPPRWRLRPLPTEYRTVARIRRYAPPSGNPPVALTLTGATNR  
IPNRSPDKALRAAIREPSPGGAYAYRGYQPHTEP  
RLPNRSPDKALCAAIREPSPVALTLTGATNRIIPNRSPDKARCAAIREPSPVALTLTGATDRIPNRSPDKAPCAAIRE-----  
PSPVALTLTGATNRLPNRSPDKALCAAIREPSPGGAYAYRGYQPHTEP 1176 781 224 Enterobacter aerogenes  
hypothetical protein [Klebsiella aerogenes]  
gi|844486473|gb|KQ087587.1|:84822-86069 gi|1172898100|ref|WP\_080967648.1|  
gi|1172898100|ref|WP\_080967648.1| 135 27 61 1.06e-13

|                                         |                                                                    |                                                                    |          |
|-----------------------------------------|--------------------------------------------------------------------|--------------------------------------------------------------------|----------|
| NPPPVALTLTGATNQIPNRSPDKALCAAIRVFTPL     | EPSPVALTLTGATNRIPNRSPDKARCAAIRESSPV                                | 836                                                                | 732      |
| 130                                     | Enterobacter aerogenes hypothetical protein [Klebsiella aerogenes] |                                                                    |          |
| gi 844486473 gb KQ087587.1 :84822-86069 | gi 1172898100 ref WP_080967648.1                                   |                                                                    |          |
| gi 1172898100 ref WP_080967648.1        | 135 1 30 1.06e-13                                                  |                                                                    |          |
| VALTLTGATNRIPNRSPDKALRAAIRESSP          | MALTLTGATNRLPNRSPDKALCAAIREPSP                                     | 915                                                                | 826 121  |
| 130                                     | Enterobacter aerogenes hypothetical protein [Klebsiella aerogenes] |                                                                    |          |
| gi 844486473 gb KQ087587.1 :84822-86069 | gi 1172898100 ref WP_080967648.1                                   |                                                                    |          |
| gi 1172898100 ref WP_080967648.1        | 135 1 30 2.18e-10                                                  |                                                                    |          |
| VALTLTGATNRIPNRSPDKALRAAIRESSP          | MALTLTGATNRLPNRSPDKALCAAIREPSP                                     | 152                                                                | 63 121   |
| 130                                     | Enterobacter aerogenes hypothetical protein [Klebsiella aerogenes] |                                                                    |          |
| gi 844486473 gb KQ087587.1 :84822-86069 | gi 1172898100 ref WP_080967648.1                                   |                                                                    |          |
| gi 1172898100 ref WP_080967648.1        | 135 27 50 2.18e-10                                                 |                                                                    |          |
| EPSPVALTLTGATNRIPNRSPDKA 73             | 2 101                                                              | Enterobacter aerogenes hypothetical protein                        |          |
| [Klebsiella aerogenes]                  |                                                                    |                                                                    |          |
| gi 844486473 gb KQ087587.1 :84822-86069 | gi 1172898100 ref WP_080967648.1                                   |                                                                    |          |
| gi 1172898100 ref WP_080967648.1        | 135 87 120 1.13e-05                                                |                                                                    |          |
| NPPPVALTLTGATNQIPNRSPDKALCAAIRVFTPL     | EPSPVALTLTGATNRLPNRSPDKALCAAIREPSP                                 | 836                                                                | 735      |
| 130                                     | Enterobacter aerogenes hypothetical protein [Klebsiella aerogenes] |                                                                    |          |
| gi 844486473 gb KQ087587.1 :84822-86069 | gi 1172898104 ref WP_080967652.1                                   |                                                                    |          |
| gi 1172898104 ref WP_080967652.1        | 105 1 105 9.68e-63                                                 |                                                                    |          |
| VALTLTGATNRIPNRSPDKARCAAIRESSPV         | ALTLTGATDRIPNRSPDKAPCAAIREPSP                                      | VALTLTGATNRLPNRSPDKALCAAIREPSP                                     | GGAYAYRG |
| YQPHTEP                                 |                                                                    |                                                                    |          |
| MALTLTGATNRIPNRSPDKARCAAIRESSPV         | ALTLTGATDRIPNRSPDKAPCAAIREPSP                                      | VALTLTGATNRLPNRSPDKALCAAIREPSP                                     | GGAYAYRG |
| YQPHTEP 423                             | 109 523                                                            | Enterobacter aerogenes hypothetical protein [Klebsiella aerogenes] |          |

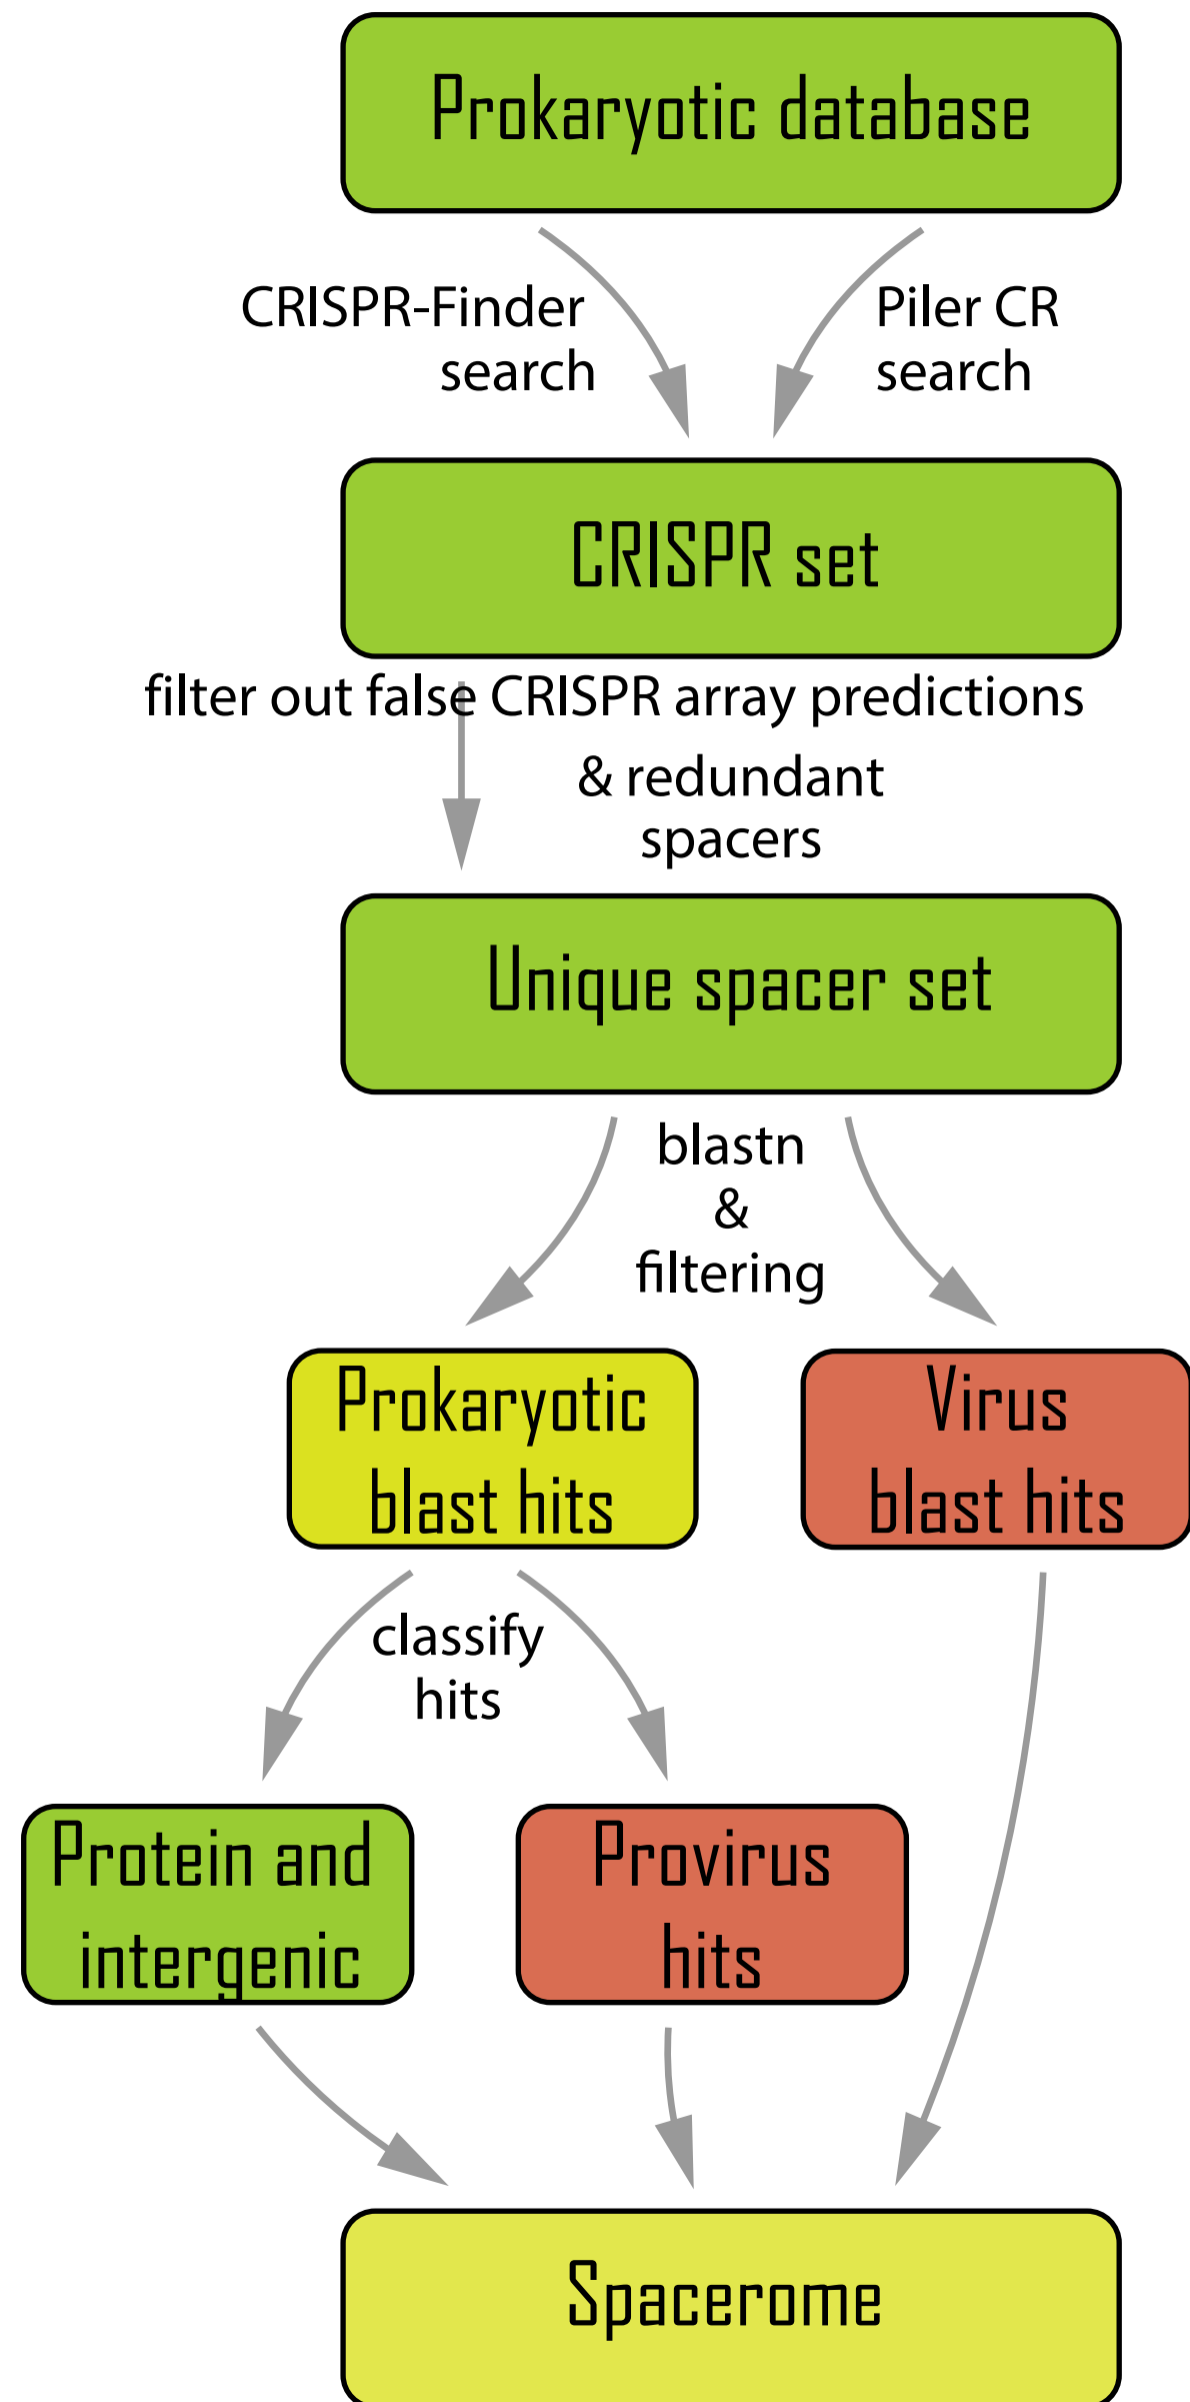

Supplementary Figure 1. The computational pipeline for CRISPR spacer analysis

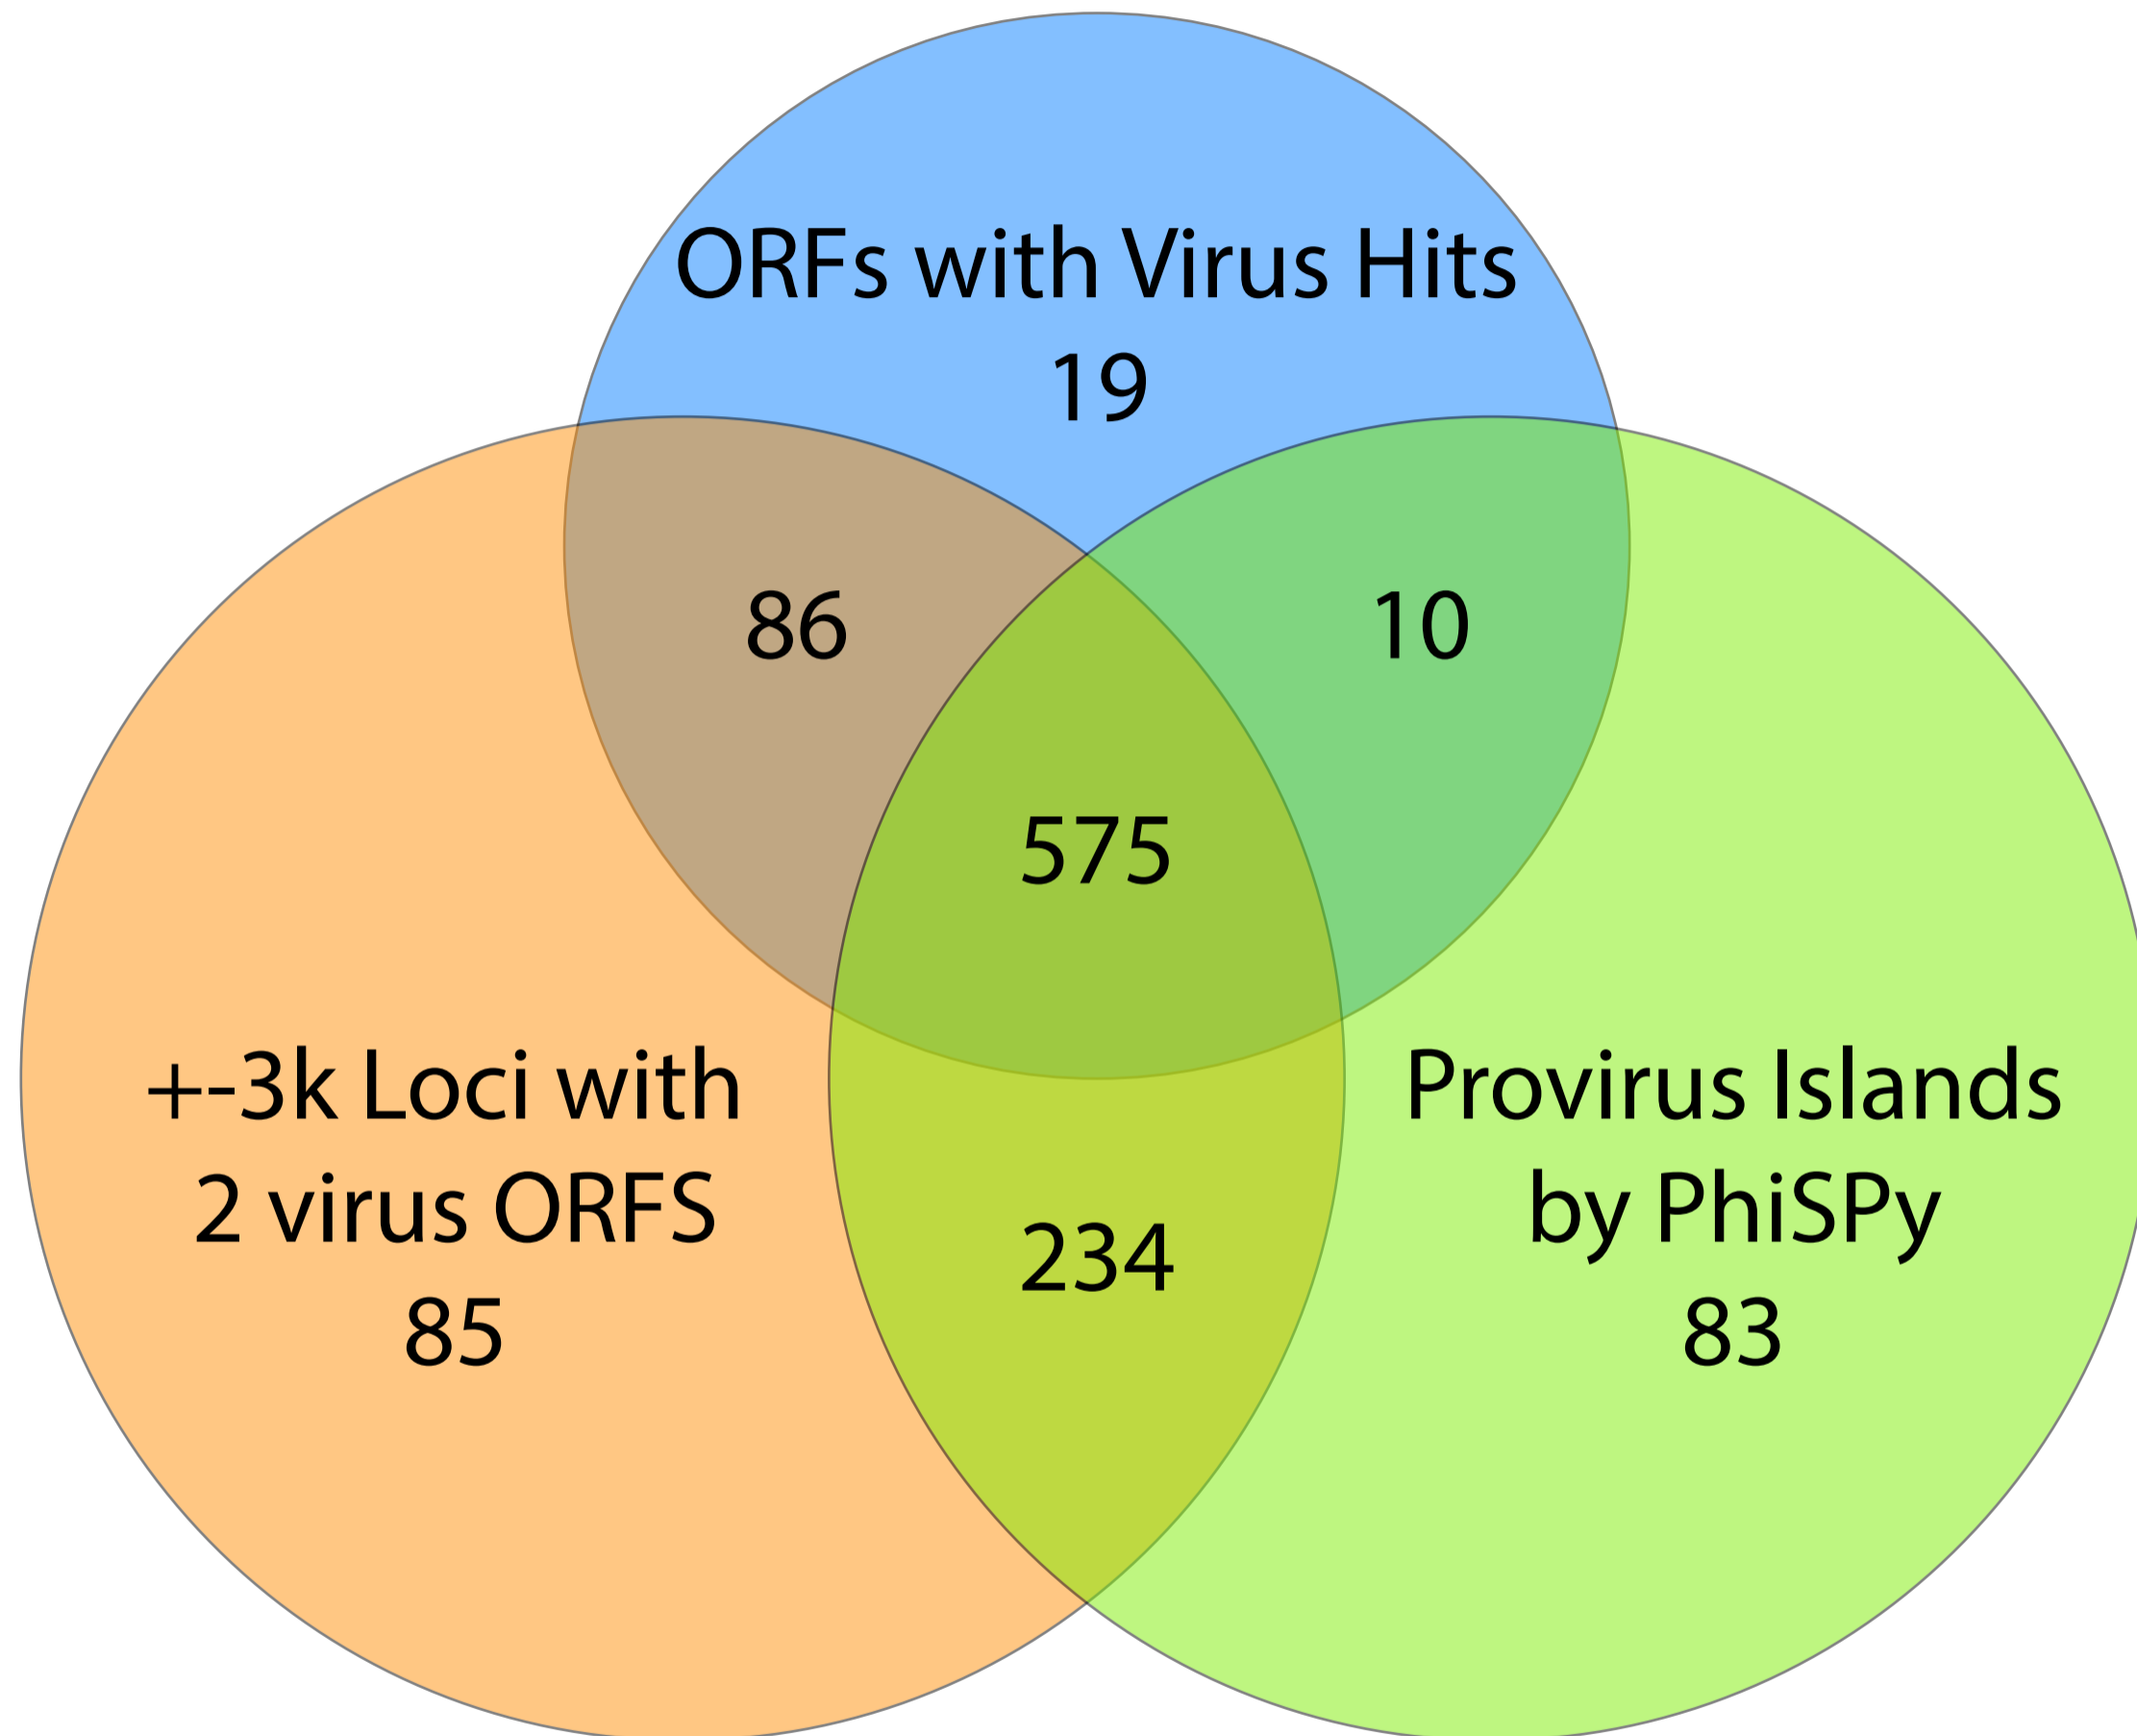

Supplementary Figure 2. Identification of prophage regions with different approaches

The spacer-host network  
Green: spacers; red: hosts

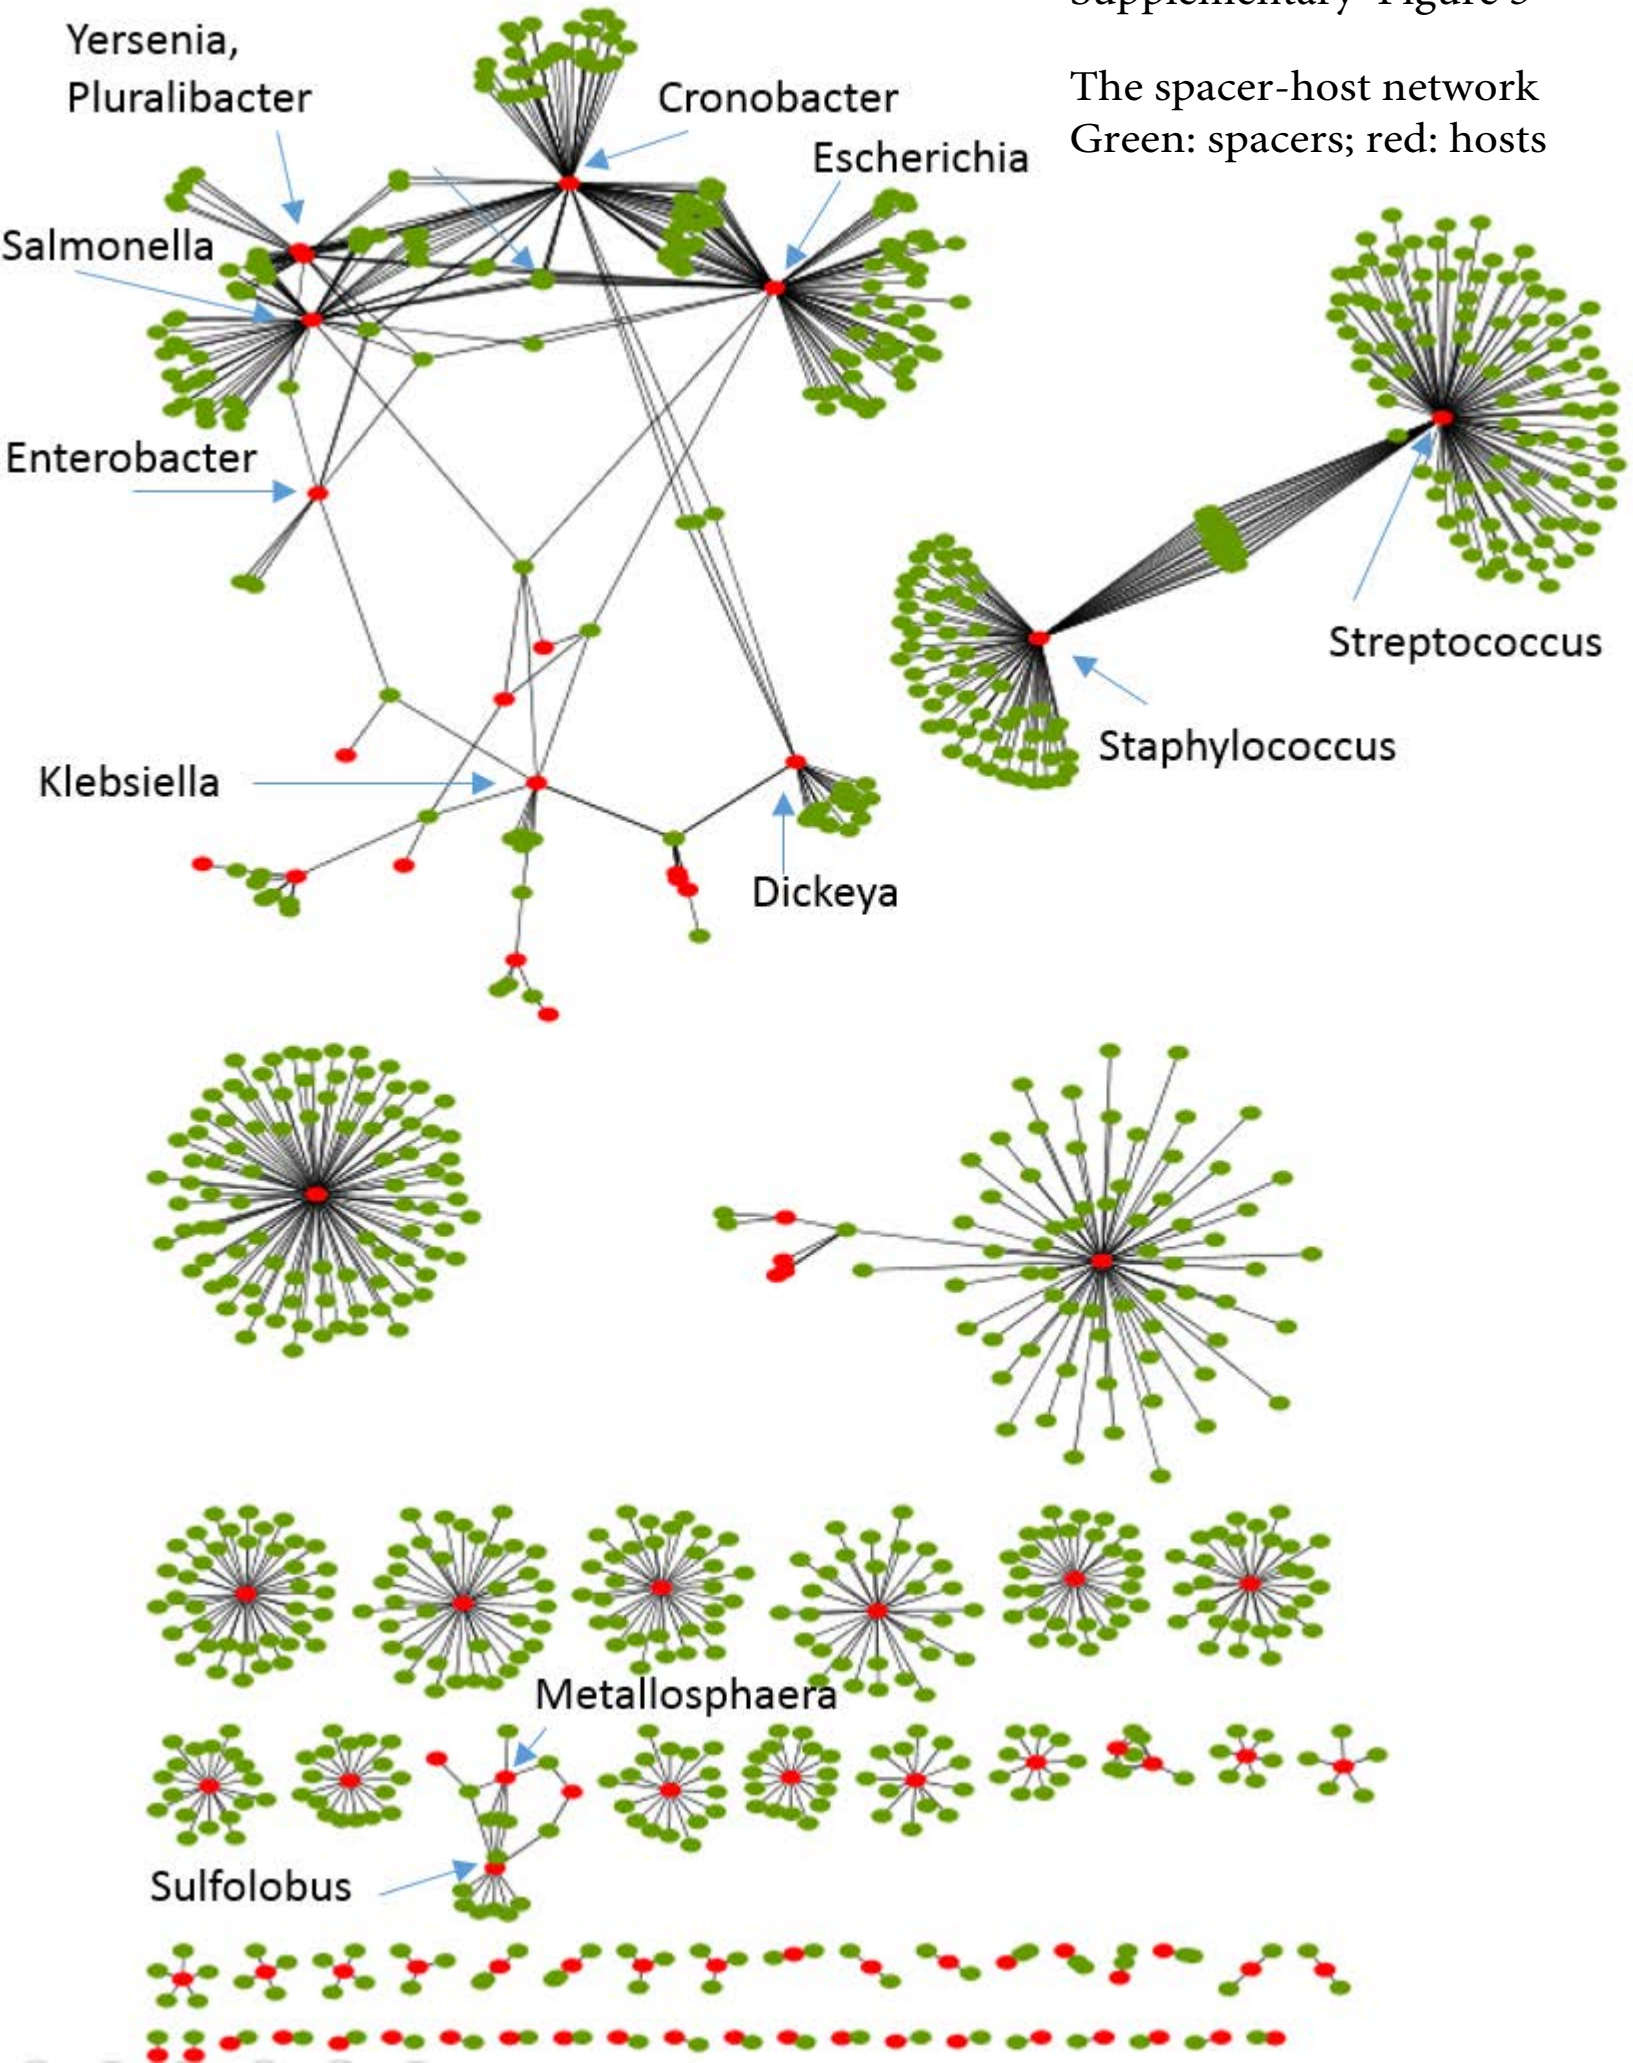

Supplementary figure 4: Principal component analysis of the dinucleotide frequencies in microbial genomes (green), CRISPR spacers (black) and cognate virus genomes (red)

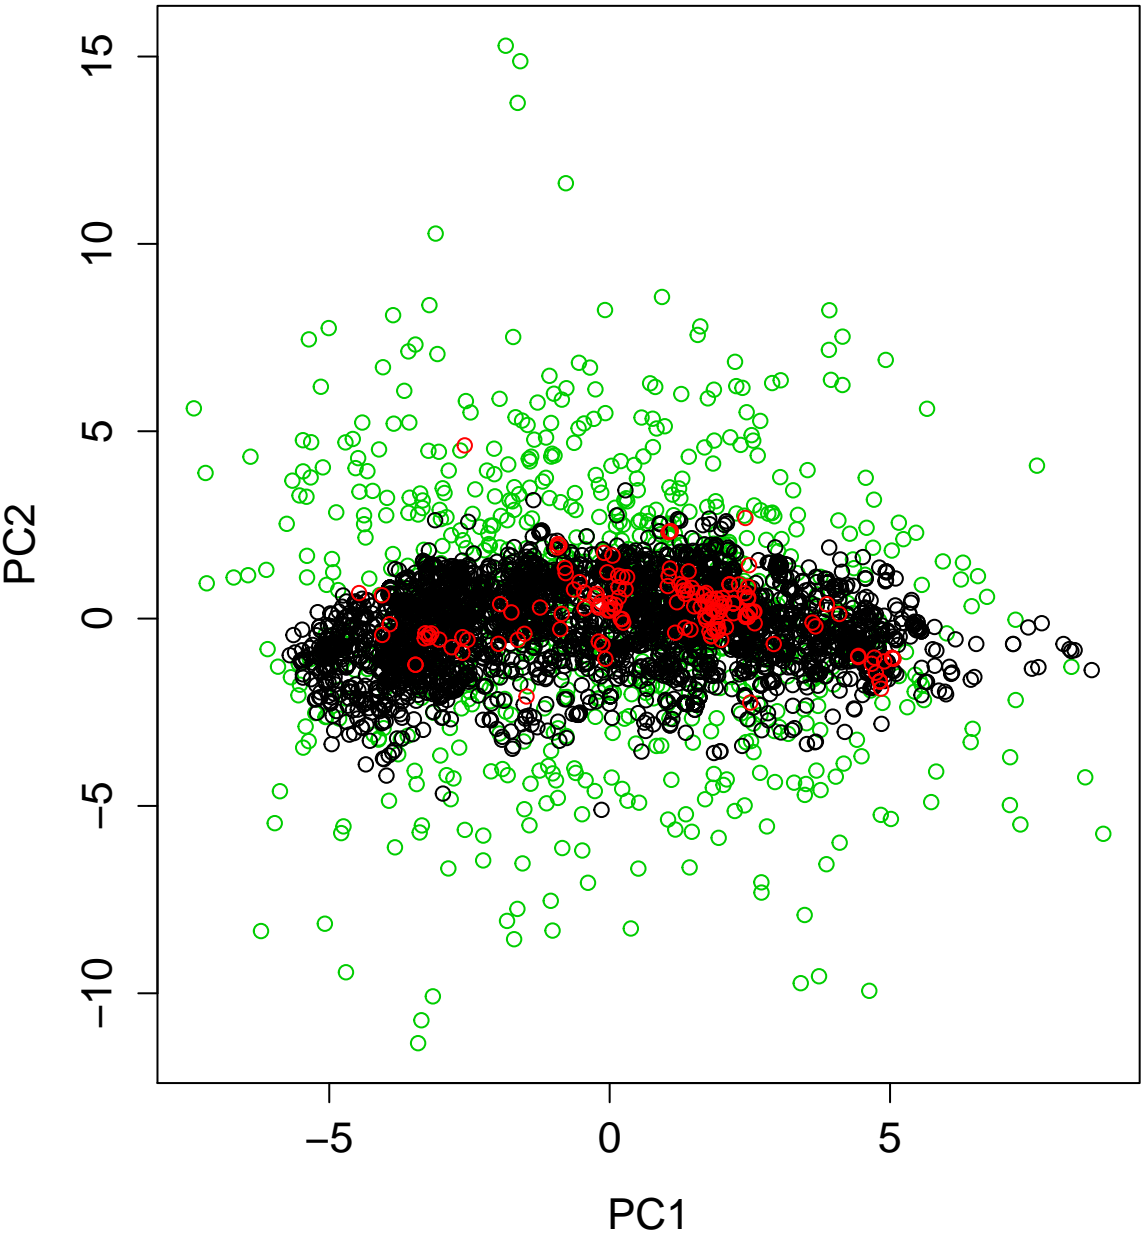



Supplementary figure 5: principal component analysis of tetranucleotide frequencies in microbial genomes (green), CRISPR spacers (black) and cognate viral genomes (red)

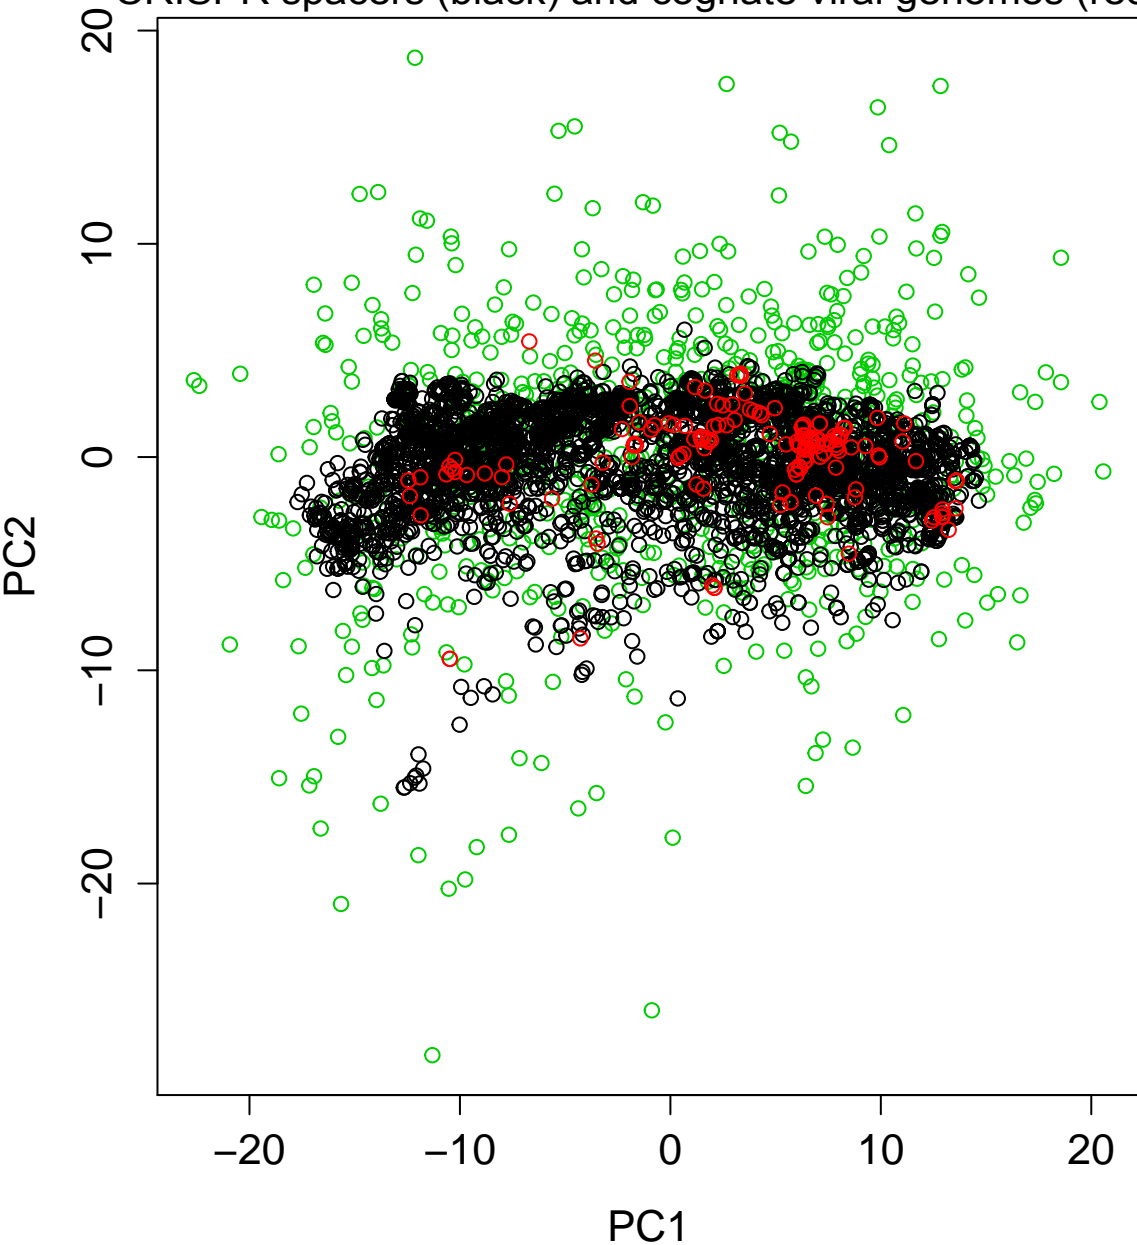

Supplementary figure 6 : Defining the threshold for CRISPR spacer identification

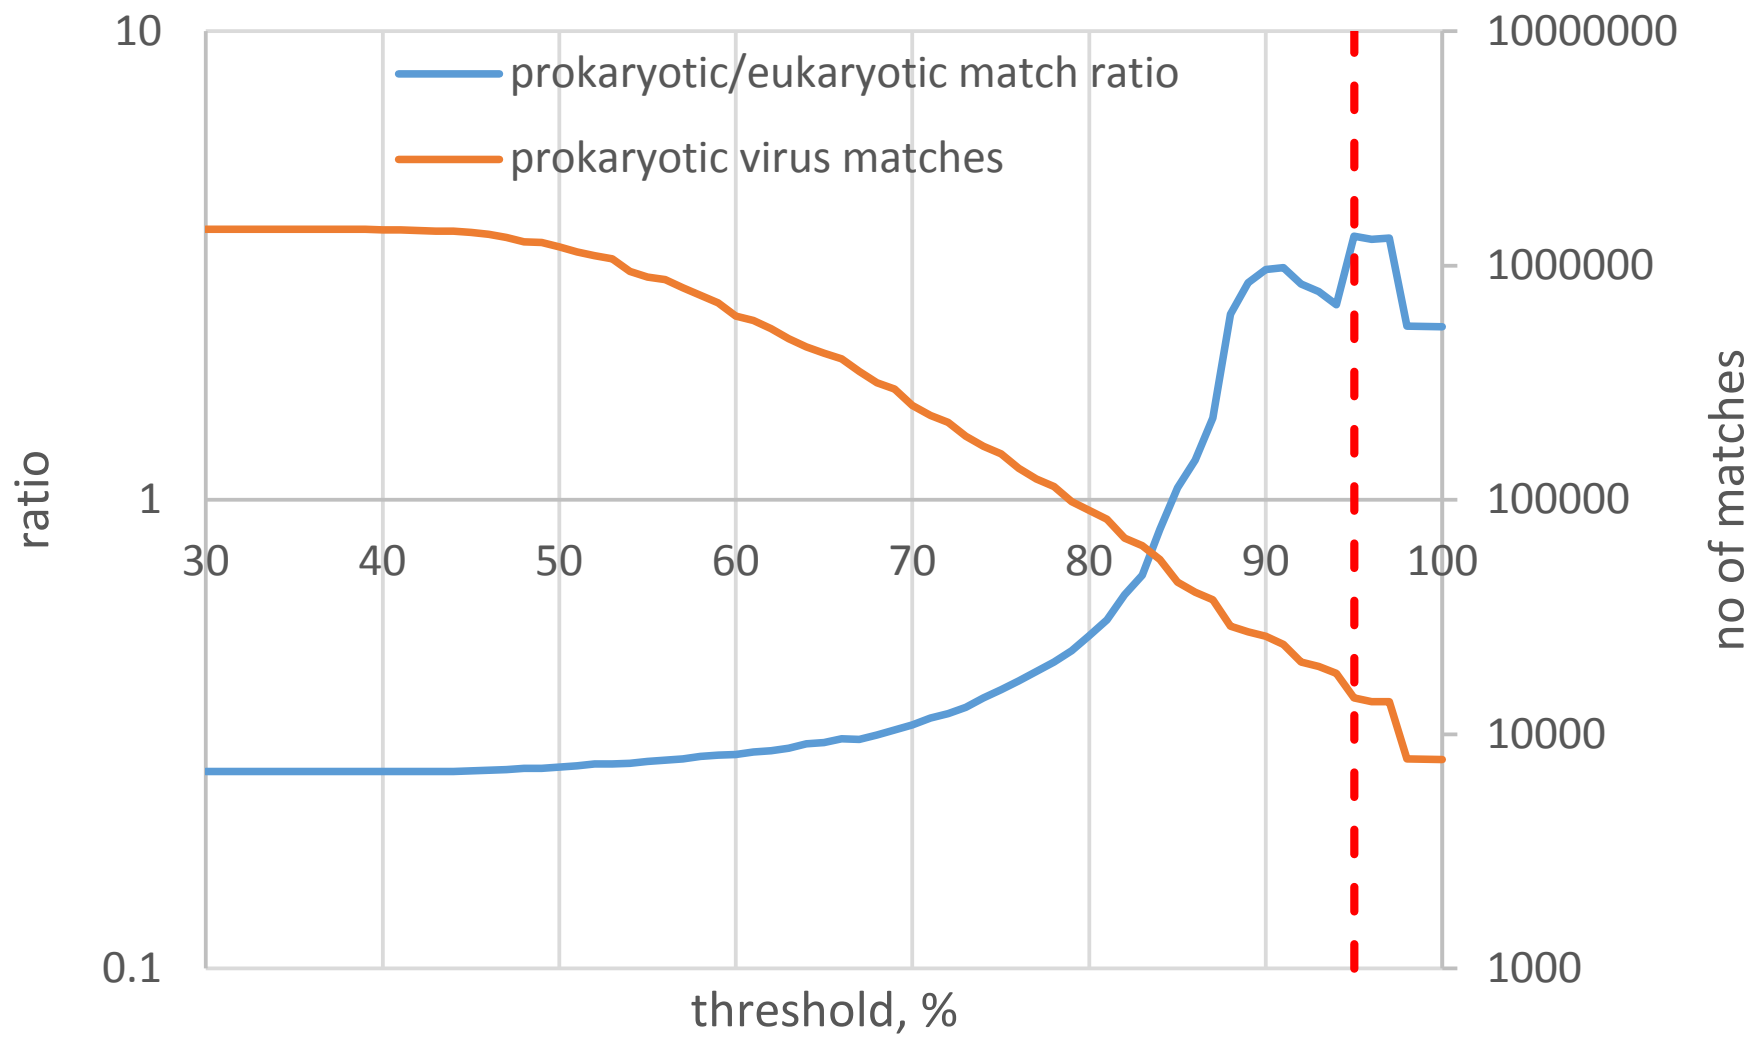

Supplement: Supplementary file [file 137356-1.pdf]
